1 **Robust blind spectral unmixing for fluorescence microscopy using unsupervised**  
2 **learning**

3 Tristan D. McRae<sup>1,2</sup>, David Oleksyn<sup>3</sup>, Jim Miller<sup>3</sup>, Yu-Rong Gao<sup>1,2\*</sup>

4

5 <sup>1</sup>Multiphoton Research Core Facility, Shared Resource Laboratories, University of Rochester Medical Center,  
6 Rochester, NY, United States of America

7 <sup>2</sup>Department of Neuroscience, University of Rochester Medical Center, Rochester, NY, United States of America

8 <sup>3</sup>Center for Vaccine Biology and Immunology and Department of Microbiology and Immunology, University of  
9 Rochester Medical Center, Rochester, NY, United States of America

10

11 \* Corresponding author

12 Email: [yurong\\_gao@urmc.rochester.edu](mailto:yurong_gao@urmc.rochester.edu) (YRG)

## 13 **Abstract**

14           Due to the overlapping emission spectra of fluorophores, fluorescence microscopy images often have  
15 bleed-through problems, leading to a false positive detection. This problem is almost unavoidable when the  
16 samples are labeled with three or more fluorophores, and the situation is complicated even further when imaged  
17 under a multiphoton microscope. Several methods have been developed and commonly used by biologists for  
18 fluorescence microscopy spectral unmixing, such as linear unmixing, non-negative matrix factorization,  
19 deconvolution, and principal component analysis. However, they either require pre-knowledge of emission  
20 spectra or restrict the number of fluorophores to be the same as detection channels, which highly limits the real-  
21 world applications of those spectral unmixing methods. In this paper, we developed a robust and flexible spectral  
22 unmixing method: Learning Unsupervised Means of Spectra (LUMoS), which uses an unsupervised machine  
23 learning clustering method to learn individual fluorophores' spectral signatures from mixed images, and blindly  
24 separate channels without restrictions on the number of fluorophores that can be imaged. This method highly  
25 expands the hardware capability of two-photon microscopy to simultaneously image more fluorophores than is  
26 possible with instrumentation alone. Experimental and simulated results demonstrated the robustness of LUMoS  
27 in multi-channel separations of two-photon microscopy images. We also extended the application of this method  
28 to background/autofluorescence removal and colocalization analysis. Lastly, we integrated this tool into ImageJ to  
29 offer an easy to use spectral unmixing tool for fluorescence imaging. LUMoS allows us to gain a higher spectral  
30 resolution and obtain a cleaner image without the need to upgrade the imaging hardware capabilities.

## 31 **Introduction**

32           Two-photon laser scanning microscopy (2PLSM) offers many advantages for imaging cell dynamics in  
33 live animals with deeper tissue penetrations, 3D contrast and resolution, and reduced phototoxicity [1,2]. The  
34 majority of *in-vivo* 2PLSM studies so far have relied on single or dual color imaging which highly limits the cell  
35 populations and physiological components that can be studied at one time [3-5]. To identify and characterize

36 complex biological mechanisms, multiple cell types or intracellular processes need to be visualized  
37 simultaneously. Adapting 2PLSM for simultaneous multi-fluorophore detection has presented a challenge due to  
38 the widely overlapping two-photon absorption spectra of commonly used fluorescent markers [6-8] as well as the  
39 high expense of incorporating multiple two-photon laser lines. Imaging specimens with a greater number of  
40 fluorescent labels is usually confronted with the bleed-through or cross-talk of fluorescence emissions. These  
41 spectral mixing artifacts often complicate the interpretation of experimental results with ambiguous  
42 discriminations, particularly if colocalization of fluorophores is under investigation or quantitative measurements  
43 are necessary. Therefore, a reliable and clean separation of different fluorescence labels is required for analysis  
44 and quantifications, and a flexible approach to overcome the hardware limitations on the number of fluorophores  
45 that can be simultaneously imaged is desired.

46         There are a wide variety of computational approaches commonly used by biologists for spectral unmixing  
47 with their own advantages and limitations. Fluorescence signals were first modeled as a linear combination of  
48 measured reference spectra of all involved fluorochromes, and linear unmixing was introduced for spectral  
49 unmixing in the fluorescence microscopy domain [9,10]. This algorithm extracts the weight of each individual  
50 spectrum with the weight proportional to the fluorophore's concentration [11,12]. Linear unmixing is  
51 advantageous in the way that it is well suited for resolving spectra from pixels that have a mixed contribution  
52 from different fluorophores, as it calculates the best linear fit of any combination of fluorescent spectra in an  
53 individual pixel. The method has been widely applied in different imaging modalities since then [12-16].  
54 However, the spectra of the contributing fluorophores may change nonuniformly due to the distortion by the  
55 complex tissue environment [17], and the assumption of superposition may be inappropriate in the presence of  
56 non-linear effects such as quenching, photobleaching, and two-photon absorption. To be solvable, linear unmixing  
57 also assumes that the number of detection channels be at least equal to the number of fluorophores which requires  
58 more advanced hardware settings such as tunable filters to detect more dyes [10,18], highly limiting the number  
59 of different labels that can be unambiguously identified in an image. In addition, the method also requires prior  
60 knowledge of the reference spectrum for a given dye, which is instrument specific and hard to measure. Following  
61 linear unmixing theory, many other methods have been introduced. Non-negative matrix factorization (NMF)

62 considers the non-negative characteristics of the fluorophore contributions [19-21], which has the advantage that  
63 prior knowledge of emission spectra is not needed, and has also been used for autofluorescence and background  
64 removal [22-24]. It is limited, however, in that it cannot be applied to situations when fluorophores outnumber  
65 detection channels. The other main problem of this approach is that there can be multiple equally valid, yet  
66 significantly different solutions. Sometimes prior knowledge about spectra is still needed to reduce the ambiguity  
67 [19]. Another unmixing method, spectral deconvolution [25], requires the acquisition of the spectral signature of  
68 each fluorophore by manually selecting the region of interest which is laborious, and requires unambiguous and  
69 exclusive expression of fluorescent labels. The method will not work when, in addition to bleed-through, there is  
70 significant cross-talk between fluorophores. Another recently developed method used for two-photon imaging,  
71 similarity unmixing [26], can work for any number of fluorophores but still requires detailed knowledge of  
72 fluorophore emission spectra and can fail when actual emissions deviate from their theoretical ideals or there are  
73 colocalized fluorophores.

74 Therefore, to improve the flexibility and applicability of multi-channel fluorescence imaging spectral  
75 unmixing, we looked for methods that do not need spectra information and are not restricted by the number of  
76 detection channels. Unsupervised learning is a class of machine learning techniques that find patterns directly  
77 from unlabeled data [27,28]. By taking advantage of the ability of unsupervised learning algorithms to  
78 automatically “learn” to identify features from raw images, we here investigated clustering based unsupervised  
79 learning in blindly unmixing channels of multi-color 2PLSM images: Learning Unsupervised Means of Spectra  
80 (LUMoS). Similar clustering methods have been applied for spectral unmixing in the remote sensing field [29-  
81 31], but never to fluorescence microscopy. By assuming the discrete labeling of biological structures, our model  
82 uses *k*-means clustering to “learn” the relationships between pixels from the raw image, and search for their  
83 intensity patterns to re-classify each pixel into a unique fluorophore group [32]. We emphasize that LUMoS  
84 requires neither the knowledge of emission spectra nor a greater or equal number of detection channels than  
85 fluorophores, which highly expands the capability of two-photon imaging. We have successfully demonstrated the  
86 ability of LUMoS to cleanly separate out up to 6 fluorophores in biological samples imaged by a 2PLSM system  
87 with only 4 detectors. Synthetic results demonstrated the accuracy and power of LUMoS in separating more



88 fluorophores under the challenging conditions of unbalanced structure size and low signal-to-noise ratio (SNR).  
89 The method can be easily translated to images acquired by other fluorescence imaging modalities such as confocal  
90 to create a clean representation of the fluorophores in the sample for quantitative analysis.

## 91 **Materials and methods**

### 92 **Sample preparations**

93 For  $N_{\text{fluorophores}} = N_{\text{detectors}}$  unmixing studies, FluoCells Prepared Slide #1 (F36924, Invitrogen, Carlsbad,  
94 CA) was used. Fixed bovine pulmonary artery endothelial (BPAE) cells were stained with a combination of  
95 fluorescent dyes. DAPI was used to label the nuclei, F-actin was stained using Alexa Fluor488 (AF488)  
96 phalloidin, and mitochondria were labeled with MitoTracker Red CMXRos.

97 For  $N_{\text{fluorophores}} > N_{\text{detectors}}$  beads unmixing studies, particles of different sizes and colors were mixed and  
98 prepared on a glass slide and covered with a #1 cover slip for imaging. The commercial beads were either surface  
99 conjugated with standard fluorophores or polymerized with an organic dye within. The emission (EM) peak was  
100 either determined by the online spectra-viewer for a standard fluorophore or provided by the nanoparticle  
101 company (Spherotech Inc., Lake Forest, IL) for an organic dye. A combination of 5 different beads was used:  
102 Light Yellow (LY, FP-2045-2, Spherotech Inc.): 1.97 $\mu\text{m}$  in diameter, 450nm peak EM; FITC (ECFP-F1,  
103 Spherotech Inc.): 3.27 $\mu\text{m}$  in diameter, 515nm peak EM; PE (ECFP-F2, Spherotech, Inc.): 3.4 $\mu\text{m}$  in diameter,  
104 575nm peak EM; Purple (FP-2062-2, Spherotech Inc.): 2.37 $\mu\text{m}$  in diameter, 620nm peak EM; APC (345036, BD  
105 Biosciences, San Jose, CA): 6 $\mu\text{m}$  in diameter, 660nm peak EM.

106 For  $N_{\text{fluorophores}} > N_{\text{detectors}}$  Colorful Cell unmixing studies, a plasmid encoding 6 independent transcription  
107 units driving expression of different fluorescent proteins to distinct intracellular compartments, Colorful Cell [33],  
108 was a gift from Pierre Neveu (RRID:Addgene\_62449; <http://n2t.net/addgene:62449>; Addgene, Watertown, MA).  
109 The 6 fluorescent proteins were TagBFP trimer fused to a nuclear localization sequence, Cerulean trimer fused to  
110 a plasma membrane targeting sequence, AzamiGreen fused to a mitochondrial localization sequence, Citrine

111 fused to a Golgi targeting sequence, mCherry fused to an endoplasmic reticulum retention sequence, and iRFP670  
112 fused to a peroxisome localization sequence. Plasmid DNA was transiently transfected into HEK293T (Pheonix)  
113 cells by calcium phosphate precipitation and assayed 48-72 hours later. By flow cytometry 40-70% of cells were  
114 expressing the transfected plasmid. For imaging, wet mounts of single cell suspensions containing 100,000 live  
115 cells/10  $\mu$ L were prepared and imaged immediately.

116 For the colocalization experiments, CD28-deficient, DO11.10 T cells were retrovirally transduced with  
117 CD28 fused at the C terminus to YFP or to Cerulean either separately or together. T cells were then mixed with  
118 stably transfected antigen-presenting cells (APCs) expressing MHC class II, ICAM-1, and CD80 that were or  
119 were not preloaded with 2.0  $\mu$ g/ml OVA peptide for 1 hour at 37°C, and pelleted at Rcf 2000 for 20 sec. The  
120 pellet was incubated at 37° C for 10 min, resuspended and plated on poly-L-lysine coated cover slips for imaging  
121 [34].

## 122 **Two-photon imaging**

123 All images were collected by an Olympus FVMPE-RS system (Olympus, Center Valley, PA) using  
124 Olympus 25 $\times$  water objective (XLPLN25XWMP2, 1.05NA). The system was equipped with two two-photon  
125 lasers: Spectra-Physics InSightX3 (680nm-1300nm, Spectra-Physics, Santa Clara, CA) and Spectra-Physics  
126 MaiTai DeepSee Ti:Sapphire laser (690nm-1040nm). There were four Photon Multiplier Tubes (PMTs) and two  
127 filter cubes for multi-color imaging. Galvanometer scanners were used for scanning. PMT gains for all imaging  
128 were used between 500 and 650 a.u. in the Olympus Fluoview software. The system schematic is shown in S1 Fig  
129 (the Blue/Green, and Red/fRed filter cubes setup is shown).

130 For  $N_{\text{fluorophores}}=N_{\text{channels}}$  unmixing studies, FluoCells Prepared Slide #1 was imaged using MaiTai laser at  
131 780nm to excite DAPI, AF488, and MitoTracker Red in the BPAE cells. 3D 512 $\times$ 512 pixel images were collected  
132 with 0.5 $\mu$ m per z step. For  $N_{\text{fluorophores}}>N_{\text{channels}}$  beads unmixing studies, multi-color beads slide was imaged using  
133 InSightX3 laser at 1000nm and MaiTai laser at 800nm simultaneously. 2D 512 $\times$ 512 pixel images were collected.  
134 For  $N_{\text{fluorophores}}>N_{\text{channels}}$  Colorful Cell separation studies, Colorful Cell slide was imaged using InSightX3 laser at

135 1050nm and MaiTai laser at 840nm sequentially with 1024×1024 pixels in x-y and 0.5μm per z step. Blue/Green  
136 cube (420-460nm/495-540nm) and red/fRed cube (575-630nm/645-685nm) were used for the above imaging. For  
137 colocalization studies, Cerulean, YFP, or Cerulean + YFP labeled cell slides were imaged with 800×800 pixels in  
138 x-y and 0.5μm per z step using InSightX3 laser at 970nm and MaiTai laser at 860nm sequentially. CFP/YFP cube  
139 (420-500nm/519-549nm) was used for this colocalization experiment.

## 140 **Data pre-processing**

141 Depending on the content of the input image, it may be appropriate to group together pixels with different  
142 net intensities but similar ratios of intensities in different z-planes. This could be necessary in fluorescence  
143 microscopy, and especially 2PLSM, in which there usually are signal intensity differences across imaging depths.  
144 This can be accounted for by dividing the intensity of a pixel  $x$  in each channel  $c$  by the overall sum of that pixel  
145 intensities across all the channels:

$$146 \quad \hat{x}_c = \frac{x_c}{\sum_{c \in \mathbf{C}} x_c} \quad (1)$$

147 where  $x_c$  is the raw intensity of pixel  $x$  in channel  $c$ ,  $\hat{x}_c$  is the scaled intensity of pixel  $x$  in channel  $c$  and  $\mathbf{C}$  is the  
148 set of all input channels. This step is not always desirable, as in some cases pixels with the same intensity ratios  
149 but different raw intensities may actually represent different structures.

150 To prevent the clustering algorithm from being biased by signal intensity differences and variations  
151 between channels, the brightness and contrast of input data were normalized to be relatively spherical  
152 distributions before clustering. Normalization also makes  $k$ -means initialize with better centroid choices and run  
153 faster with fewer iterations to converge [32,35]. Therefore, clustering was performed on  $z$ -scores where the  $z$ -  
154 score is the number of standard deviations away from the mean a signal. This can be expressed for a given pixel  $x$   
155 as:

$$156 \quad z_{x,c} = \frac{\hat{x}_c - \mu_c}{\sigma_c} \quad (2)$$

157 where  $z_{x,c}$  is the  $z$ -score for pixel  $x$  in channel  $c$ , and  $\mu_c$  and  $\sigma_c$  are the overall mean and standard deviation of all  
158 pixels in channel  $c$ . This can be done to pixels with either non-scaled intensities ( $x_c$ ) or scaled intensities ( $\hat{x}_c$ ) as  
159 in Eq1.

## 160 **LUMoS algorithm**

161 We here present an unsupervised machine learning clustering method (Learning Unsupervised Means of  
162 Spectra, LUMoS) to learn the spectral signatures of each fluorophore and assign each pixel to the cluster whose  
163 spectral signature is closest. The process is referred to as “unsupervised” because no human intervention is  
164 required to label any pixels as belonging to a particular fluorophore, and the algorithm can identify features from  
165 raw images simply by looking at the pixels’ intensity values across all the detection channels. Specifically, a hard  
166 clustering method,  $k$ -means clustering, was used to separate mixed fluorophores unambiguously.

167 Pixels that are spatially close tend to belong to the same structure, and thus stained by the same  
168 fluorophore. To leverage this spatial information to improve the unmixing ability of LUMoS beyond the single-  
169 pixel level, a median filter ( $3 \times 3 \times 3$  or  $5 \times 5 \times 5$ ) is first applied to the image before clustering. In order to preserve  
170 potentially meaningful variations in intensity in the raw image, the median filter is only applied at the clustering  
171 stage and the intensity output for each pixel is still taken from the raw image.

172 Given a set of observations  $\mathbf{X}$ , containing  $n$  individual observations:  $x_1, x_2, \dots, x_n$ , the objective of  $k$ -  
173 means is to partition all observations into  $k$  different clusters,  $\mathbf{S} = \{S_1, S_2, \dots, S_k\}$ , in a way that minimizes within-  
174 cluster variance. This can be expressed as

$$175 \min_{\mathbf{S}} \sum_{x \in X} \min_i \|x - s_i\|^2 \quad (3)$$

176 where  $s_i$  is the centroid of cluster  $S_i$ . Unlike other applications where  $k$  is difficult to define and requires tuning to  
177 optimize, in our case, the number of clusters  $k$  is simply the total number of fluorophores plus 1 more cluster that  
178 represents the background. The cluster centroid resulting from this approach can be interpreted as the spectral  
179 signatures of each fluorophores. These are the spectral means alluded to in the name *Learning Unsupervised*  
180 *Means of Spectra (LUMoS)*.

181           The algorithm partitions the data into  $k$  clusters using Eq3 as a loss function.  $K$ -means approximates the  
182 solution to minimize the loss function by assigning data points to the class to whose centroid they are closest, and  
183 iteratively updating the centroid. Fig 1 details the steps taken in LUMoS. There are several algorithms for  
184 initializing the cluster centroids and we implemented the  $k$ -means++ initialization algorithm for its speed and  
185 convergence properties [36]. Briefly,  $k$ -means++ chooses the first cluster centroid at random from the input data  
186 points, and each subsequent cluster centroid is selected from the remaining data points with the probability  
187 inversely related to the distance from the closest appointed centroid. The algorithm converges when clusters do  
188 not change following one iteration. The maximum number of iterations allowed per replicate,  $max\_iter$ , was set to  
189 100 to limit run time. The iterative algorithm was applied  $num\_replicates$  times and the replicate with the lowest  
190 cost was used in accordance with the loss function given in Eq3. All the unmixing performed in this paper used 10  
191 replicates. The values of  $num\_replicates$  and  $max\_iter$  can be tuned, with more replicates and iterations yielding  
192 higher quality results but longer runtime.

---

Algorithm 1: LUMoS Spectral Unmixing

---

**Input:**  $\mathbf{X}$ ,  $max\_iter$ ,  $num\_replicates$ ,  $k$

Apply median filter to each channel of  $\mathbf{X}$

**for**  $r \leftarrow 1$  **to**  $num\_replicates$  **do**

Select the first centroid,  $s_{1,r}$ , at random from  $x \in \mathbf{X}$  with probability  $\frac{1}{n}$

**for**  $i \leftarrow 2$  **to**  $k$  **do**

Select the next centroid,  $s_{i,r}$ , at random from  $x \in \mathbf{X}$  with probability  $\frac{D(x)^2}{\sum_{j=1}^n D(x_j)^2}$   
where  $D(x)$  is the Euclidean distance from  $x$  to the closest already chosen center

**while** *not converged* and  $iter < max\_iter$  **do**

**for**  $i \leftarrow 1$  **to**  $k$  **do**

Set the cluster  $S_{i,r}$  to be the set of points in  $\mathbf{X}$  that are closer to  $s_{i,r}$  than they are to  $s_{j,r}$  for all  $j \neq i$

**for**  $i \leftarrow 1$  **to**  $k$  **do**

Set  $s_{i,r} = \frac{1}{|S_{i,r}|} \sum_{x \in S_{i,r}} x$

increment  $iter$

$cost_r = \sum_{i=1}^k \sum_{x \in S_{i,r}} \|x - s_{i,r}\|^2$

$best\_replicate = \operatorname{argmin}_r cost_r$

Assign output cluster,  $c$ , to each pixel such that  $c = \operatorname{argmin}_i \|x - s_{i, best\_replicate}\|^2$

**Output:** Output cluster for each pixel

---

193

194

**Fig 1. LUMoS spectral unmixing algorithm.**

195

Once the algorithm converges, a new output image is created with  $k$  channels where each channel belongs

196

to one cluster. In the output image, a pixel  $x$  assigned to one channel  $c$  is given the value of the highest intensity

197

of that pixel among all the  $C$  input channels, and any pixel not belonging to channel  $c$  is assigned a value of 0:

198

$$y_i = \begin{cases} \max_{c \in C} x_c & \text{if pixel } y \text{ belongs to cluster } S_i \\ 0 & \text{otherwise} \end{cases} \quad (4)$$

199

where  $y_i$  is the intensity of output pixel  $y$  in output channel  $i$ .

200

At its core, spectral unmixing is the task of decomposing mixed multichannel images into spectral

201

signatures and abundances of each signature in each pixel [9,37,38]:

$$\begin{bmatrix} X_{1,1} & \cdots & X_{1,n} \\ \vdots & \ddots & \vdots \\ X_{C,1} & \cdots & X_{C,n} \end{bmatrix} = \begin{bmatrix} A_{1,1} & \cdots & A_{1,k} \\ \vdots & \ddots & \vdots \\ A_{C,1} & \cdots & A_{C,k} \end{bmatrix} \begin{bmatrix} B_{1,1} & \cdots & B_{1,n} \\ \vdots & \ddots & \vdots \\ B_{k,1} & \cdots & B_{k,n} \end{bmatrix} \quad (5)$$

203 which may be simplified as:  $X = AB$ .

204 In Eq5,  $X$  is the observed fluorescence intensities of  $n$  pixels in  $C$  different spectral channels. The  
205 endmembers are the known fluorophores used to label the sample.  $A$  is a  $C \times k$  matrix of the spectral signatures  
206 for each of the  $k$  fluorophores, in which each column is the recorded intensity of a fluorophore across the  $C$   
207 detection channels.  $B$  is a  $k \times n$  matrix containing the abundances of each fluorophore in each pixel. In LUMoS  
208 unmixing,  $B$  is obtained by scaling each pixel's class label to the original intensity of that pixel as described in  
209 Eq4, which is based on a binary assumption that each pixel is occupied by only one fluorophore. Unlike other  
210 linear unmixing algorithms, LUMoS unmixes based on clustering rather than directly solving Eq5 with linear  
211 methods; because of this, LUMoS is different in that 1) the prior knowledge of fluorophore spectra ( $A$ ) is not  
212 required to do the inversion of the equation and calculate the abundances ( $B$ ), 2) it is not required that the number  
213 of fluorophores or endmembers ( $k$ ) must be less than the number of detection channels ( $C$ ), and 3) the abundances  
214 ( $B$ ) are not the fractions of all endmembers, but are binary results assuming one endmember per pixel (Eq4).

## 215 **Synthetic data**

216 In order to test the capabilities of LUMoS across a wide range of conditions, we generated synthetic data  
217 for unmixing. We assumed the hardware for the simulated imaging to be the same as our two-photon system with  
218 2 two-photon lasers and 4 detection channels (blue: 420-460nm, green: 495-540nm, red: 575-630nm and far-red  
219 645-685nm). For each simulated fluorophore, a theoretical emission spectrum was generated (Fig 2A). The  
220 intensity distribution was modeled as a Weibull distribution (Eq6) with  $a = 1.7$  and  $b = 100$  to reflect the  
221 tendency of a fluorochrome to have a long tail at the longer wavelength [37].

$$222 \quad \text{Relative Intensity} = \frac{a}{b} \left( \frac{\lambda - c}{b} \right)^{a-1} e^{-((\lambda - c)/b)^a} \quad (6)$$

223 where  $\lambda$  is emission wavelength and  $c$  is a constant to shift the peak of the emission spectra for different synthetic  
224 fluorophores.

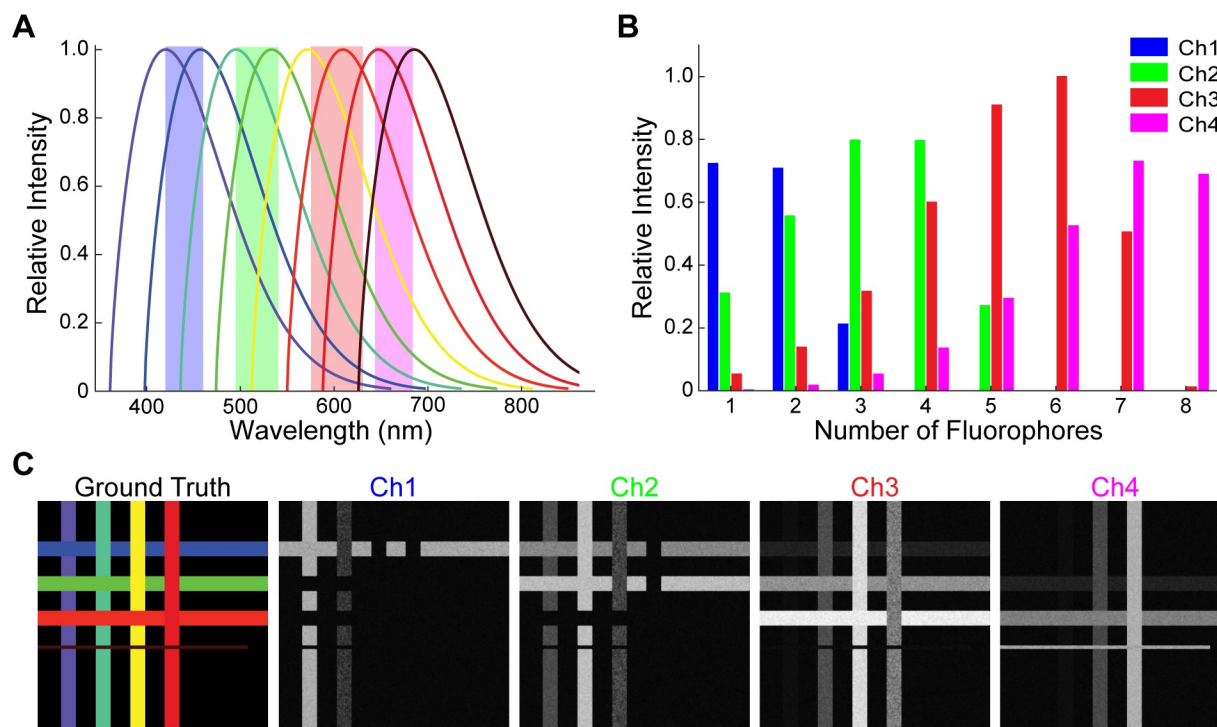

225

226 **Fig 2. Synthetic data.**

227 (A) Synthetic emission spectra of 8 fluorophores. Bandwidth of the 4 detection channels were marked in shaded  
228 areas. For simplicity, the emission spectra of synthetic fluorophores were assumed to be the same Weibull  
229 distribution with the peaks of all fluorophores evenly distributed between 420nm and 685nm. (B) Spectral  
230 signatures of the 8 synthetic fluorophores in A. The intensity of each fluorophore was measured as the integrated  
231 area under the spectral curves in A. (C) Synthetic 2PLSM images based on the emission spectra in A. The ground  
232 truth image shows the 8 synthetic fluorophore expressing structures. Ch1-Ch4 images were the raw images from  
233 the 4 detection channels with an SNR of 10. Each fluorophore was synthesized to be expressed in a narrow band  
234 either vertically or horizontally. 7 of the 8 bands had the same area, while 1 small band (furthest red fluorophore)  
235 has an area  $1/5^{\text{th}}$  (cluster size ratio 0.2) of the rest.

236 The emission peaks were evenly spaced between 420nm and 685nm so that all fluorophore peaks fell  
237 within the detection range of the microscope. We assumed all fluorophores were excited effectively, and their  
238 emission spectra peak at the same magnitude. Consistent spectral shapes and spacing represented an ideal case for  
239 easy simulations, but in reality, fluorophores usually have different shapes of spectra or even multiple peaks. To



240 facilitate the generation of a synthetic image for an arbitrary number of fluorophores, a grid pattern was created  
241 where each successive fluorophore occupies an alternating vertical or horizontal strip (Fig 2C). For this synthetic  
242 data, the ideal situation where each pixel is occupied by only one fluorophore is assumed, to mimic the general  
243 biological staining assumptions without considering the nano-scale colocalizations caused by spatial resolution  
244 limitations. This pattern is overlaid onto a background with no fluorophores present. All synthetic images were  
245 512×512 pixels. The length and width of the strip of the furthest red fluorophore was set variable while the rest of  
246 fluorophore expressing strips were fixed to be 512 pixels long and  $\frac{256 \text{ pixels}}{\# \text{ of fluorophores}}$  wide. This allowed us to  
247 measure the performance of LUMoS with unbalanced structure sizes. Cluster size ratio was the area of the minor  
248 fluorophore strip (furthest red) divided by the area of the major fluorophore strip.

249 Within each strip, all pixels belong to the same fluorophore but they all have slightly different emission  
250 spectra from the ideal value expressed in Eq6. Each pixel's adjusted spectrum was shifted by a randomly selected  
251 wavelength with a standard deviation of 10nm to represent the variance present in real imaging. A four-channel  
252 representation of the pixel was then generated by integrating the emission spectrum within the bandpass of the  
253 detection channels (Fig 2B). For pixels with no fluorophore, a small background noise was added from a Gaussian  
254 distribution with a mean of 2 and standard deviation of 1. Additional Poisson noise was then applied to each  
255 channel to mimic the shot noise. At the end, the image was convolved with a Gaussian filter with a standard  
256 deviation of 0.5 and a 3×3 median filter to represent real-world diffusion effects.

257 Synthetic data unmixing performance was evaluated with the F1 score between the LUMoS output and  
258 the ground truth image (Fig 2C):

$$259 \quad F1 = 2 \times \frac{\textit{precision} * \textit{recall}}{\textit{precision} + \textit{recall}} \quad (7)$$

$$260 \quad \textit{where precision} = \frac{\textit{true positives}}{\textit{true positives} + \textit{false positives}}, \textit{ and recall} = \frac{\textit{true positives}}{\textit{true positives} + \textit{false negatives}}.$$

## 261 **Results**

$$262 \quad N_{\text{fluorophores}} = N_{\text{detectors}}$$

263           First, we started with a simple case in which there was same number of fluorophores as imaging channels.  
264 BPAE cells with nuclei stained with DAPI, F-actin labeled with AlexaFluor488 (AF488), and mitochondria  
265 labeled with MitoTracker Red were imaged using 780nm laser [39,40] to excite all three fluorophores (Fig 3A).  
266 Due to the long tail of the DAPI emission spectrum (Fig 3C), F-actin signals in the green channel were  
267 contaminated by the nuclei signals (Fig 3A). DAPI had strong signals in both blue and green channels, while  
268 AF488 and MitoTracker Red were distinct in green and red channels respectively. Therefore, each fluorophore  
269 had a unique distribution of intensity across channels—"spectral signature", calculated as the intensity of the  
270 pixels in one LUMoS cluster detected by each channel in the raw image (Fig 3D). LUMoS was able to group  
271 pixels with similar spectral signatures into the same cluster and re-assign each pixel into the correct fluorophore  
272 cluster. As only the blue and green channels had bleed-through issues, we applied LUMoS unmixing only on  
273 these two channel images, and produced 3 output channels (DAPI, AF488, and background). After the unmixing  
274 procedure, the spectral overlap of the DAPI and AF488 was corrected, and the unmixed images now represent the  
275 abundance of each of the fluorophores (Fig 3B, the 3D unmixing results were shown in S2 Movie).

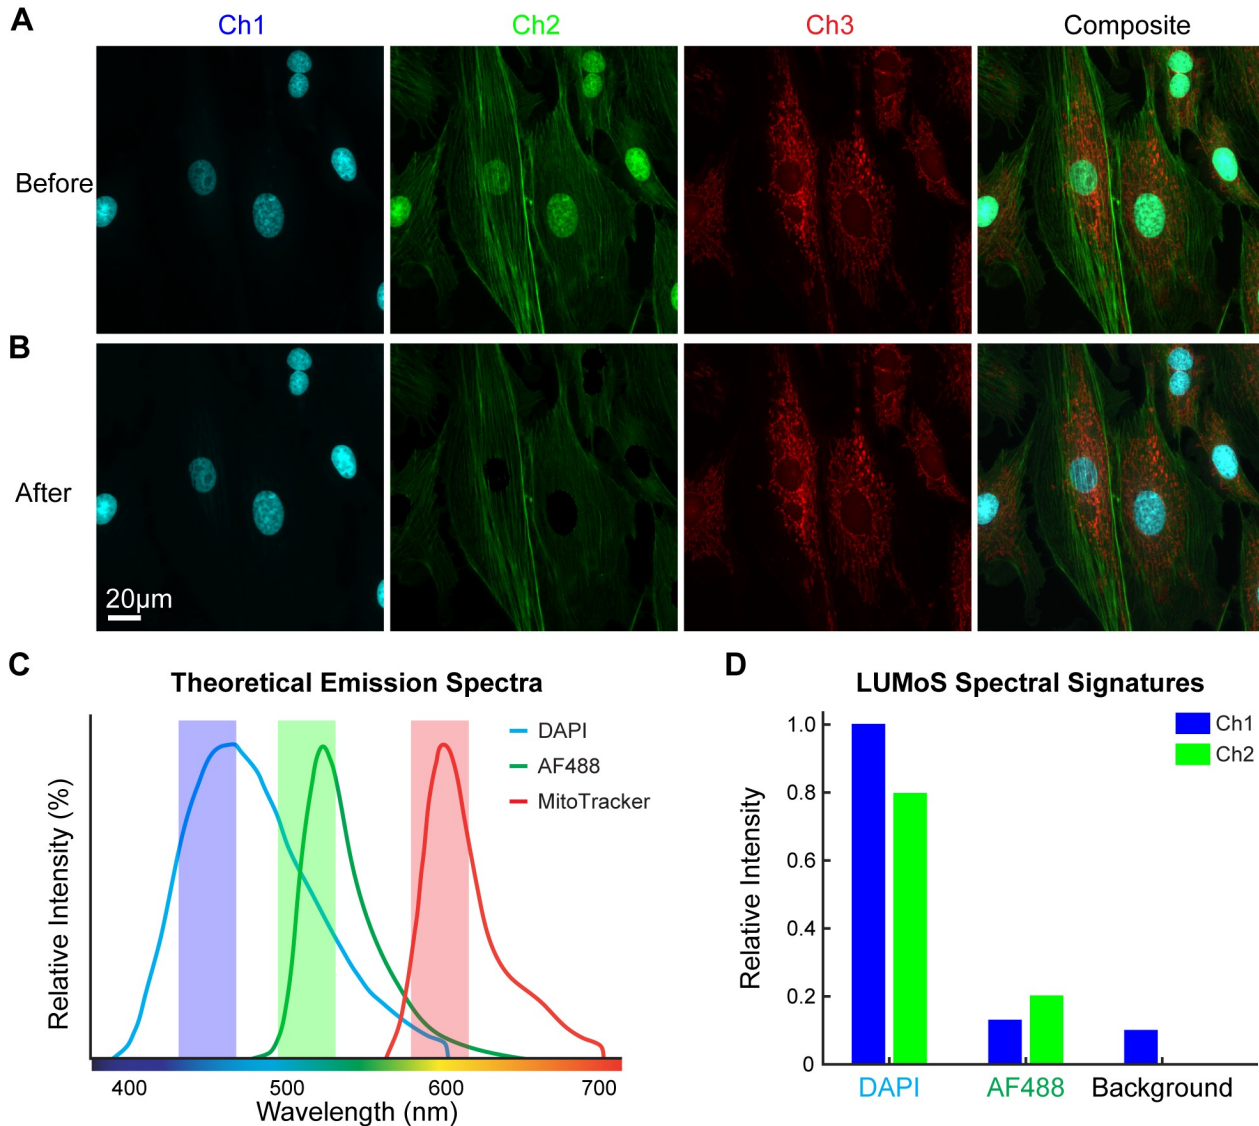

276  
277

**Fig 3. LUMoS unmixing of BPAE cells with channels bleed-through.**

278 (A) BPAE cell stained with DAPI in nuclei, AF488 in actin, and MitoTracker Red in mitochondria, and imaged  
279 with 2PLSM. Images shown were 2D maximum intensity projections of 3D z-stacks. The green channel (Ch2)  
280 had a mix of actin and nuclei with the DAPI signals bleeding into the AF488. (B) LUMoS unmixing results of the  
281 mixed images in A. Only Ch1 and Ch2 images were used for separation. Note the clear separation of the nuclei  
282 from the green channel after unmixing. Background pixels were removed. (C) The theoretical emission spectra of  
283 DAPI, AF488 and MitoTracker Red. The filter bandwidths were plotted as shaded areas. Note the long tail of the  
284 DAPI spectrum blending into the green channel. (D) The relative intensities of the LUMoS unmixed DAPI and

285 AF488 pixel clusters detected by the green and blue channels. Background was separated as an additional cluster  
286 with relatively low intensity in both channels.

287  **$N_{\text{fluorophores}} > N_{\text{detectors}}$**

288 The two-photon excitation spectrum of a fluorophore is usually broader than the one-photon spectra and  
289 may have multiple peaks [7,41], making it possible to just use one or two two-photon laser lines to excite multiple  
290 fluorophores simultaneously, which is both time and cost efficient. On the other hand, simultaneous excitation  
291 also leads to the issue of channel cross-talk which limits the number of detection channels to usually less than 4  
292 for two-photon microscopy. This makes the ability to image more fluorophores than detectors crucial for many  
293 applications. As the LUMoS method has no intrinsic requirement that the number of channels be at least equal to  
294 number of fluorophores, we next ascertained the limit of our method by imaging more colors simultaneously  
295 without modifying the imaging hardware.

296 To test the performance of LUMoS on a sample with more fluorophores than detectors, we first imaged  
297 mixed beads with 5 different fluorophores: LY (Light Yellow dye from Spherotech Inc.), FITC, PE, Purple  
298 (Purple dye from Spherotech Inc.), and APC (Fig 4A). The theoretical emission spectra are shown in Fig 4C.  
299 Simultaneous two-photon excitations at 800nm (MaiTai laser) and 1100nm (InsightX3 laser) were used to excite  
300 all fluorophores [39]. Because of the significant emission spectra overlaps of LY and FITC in the green channel,  
301 PE and Purple in the red channel, and PE, Purple and APC in the far-red channel, the raw images collected by the  
302 4 detectors (Fig 4A) showed many beads appearing in more than one channel (examples are indicated by white  
303 arrows in Fig 4A). The spectral signatures of those fluorophores (Fig 4D) were consistent with the emission  
304 spectra information in each channel, which demonstrated the uniqueness of each fluorophore's intensity  
305 distribution across the 4 detectors. We therefore applied LUMoS with 6 clusters to the raw 5-color beads images.  
306 The algorithm generated 6 new images in which 1 image included all background pixels and the other 5 images  
307 each represented one single fluorophore. We removed the background to get the clean unmixed outputs (Fig 4B).

308 The algorithm performed well to fully separate out the 5-color beads with individual beads belonging only to a  
309 single output channel.

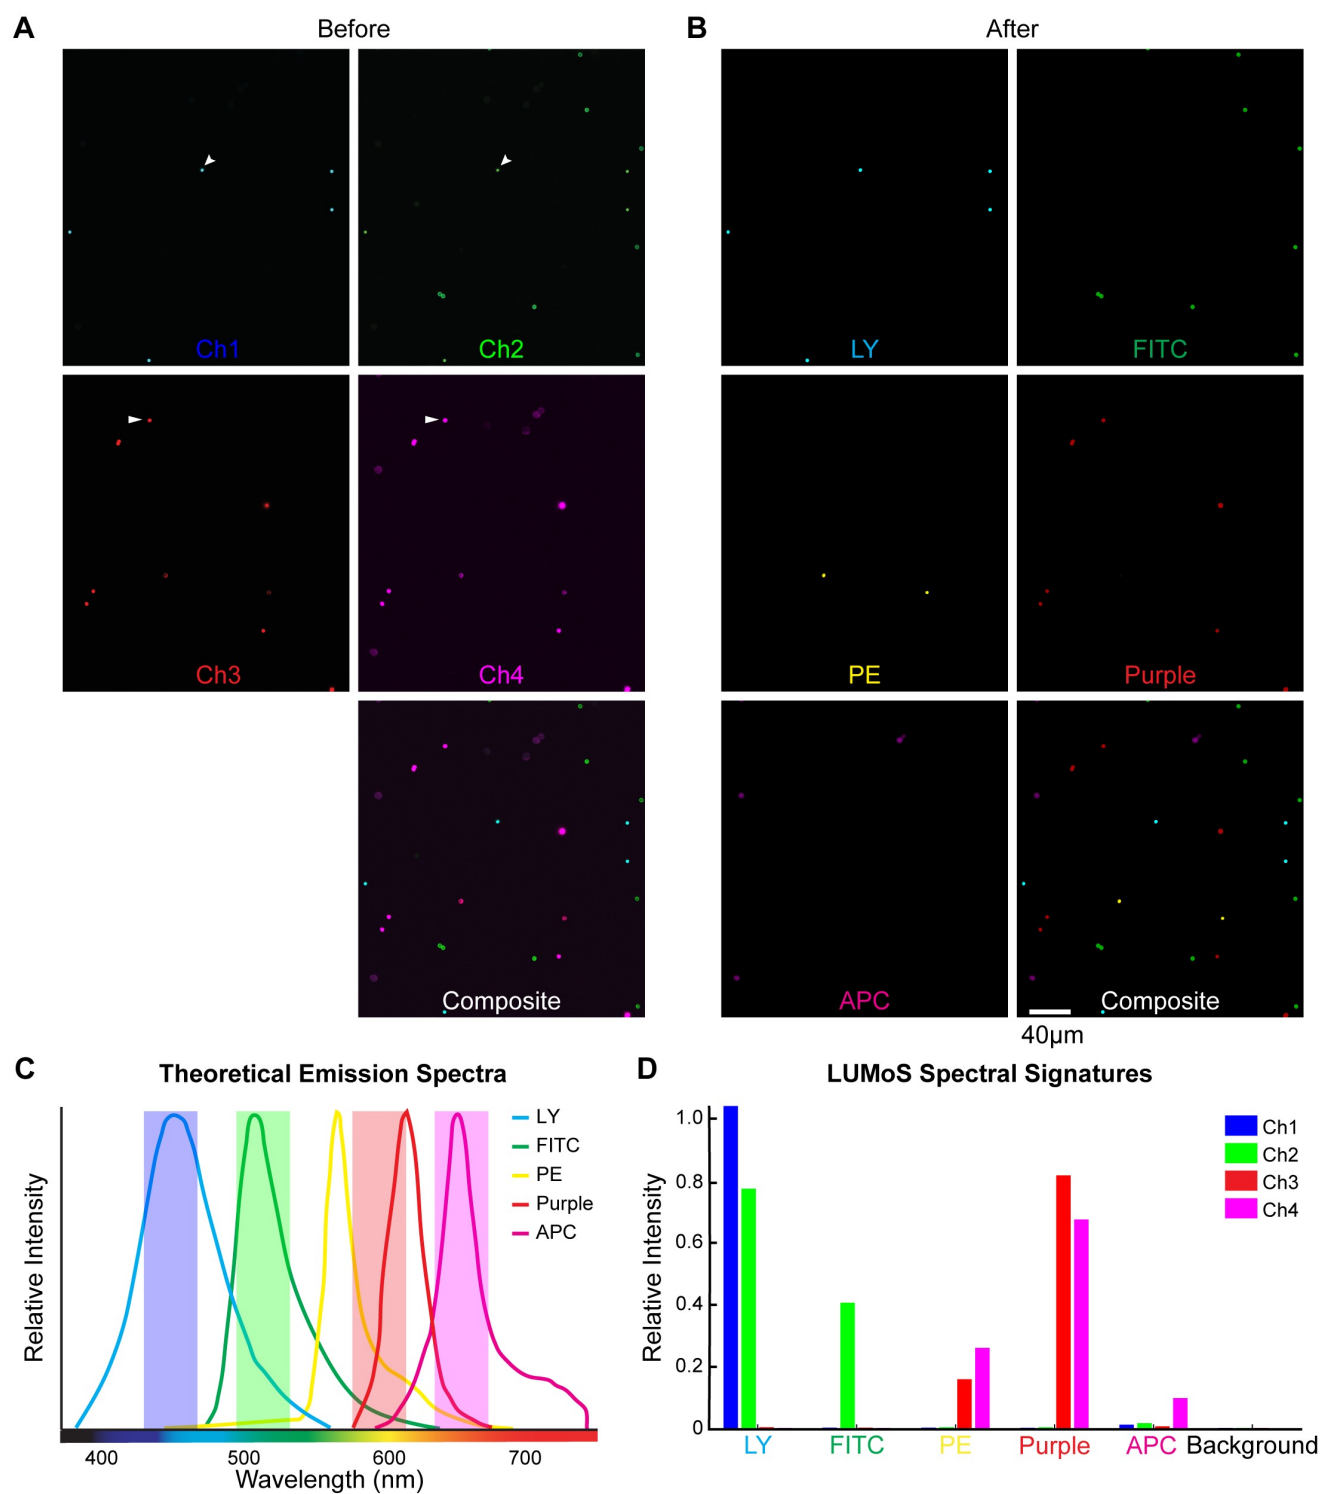

310  
311 **Fig 4. LUMoS unmixing of 5-color beads mixed in 4 detection channels.**

312 (A) Mixed beads stained with Light Yellow (LY), FITC, PE, Purple, and APC imaged with 2PLSM. LY and  
313 Purple are special dyes by Spherotech. It was unable to resolve 5 colors with 4 detectors, and there were also  
314 beads shown in more than one channels. Two examples are pointed out by white arrows. (B) The images shown in  
315 A after processing through LUMoS. The first five images show the fluorescence of the five different beads  
316 separated from the 4 detection channels by the LUMoS and the last image is the composite showing all five beads  
317 as clearly separated objects. (C) Theoretical emission spectra of the 5 fluorophores. LY and Purple spectra were  
318 obtained from Spherotech, and FITC, PE and APC were obtained from online spectra-viewer. There were  
319 significant overlaps of all the 5 fluorophores. (D) The relative intensity of the pixels of each separated fluorophore  
320 in the 4 channels. Each fluorophore was represented with a unique spectral signature. Background pixels formed  
321 one additional cluster with low pixel intensities in all the channels.

322 Commonly used dyes differ not only in their emission spectra but also their excitation spectra. The  
323 differences in excitation efficiency offers additional features for LUMoS to better separate out more fluorophores.  
324 In the next example, we used sequential scan by alternating two-photon excitations at 840nm (MaiTai laser) and  
325 1050nm (InsightX3 laser) to visualize 6 compartments with distinct labels in one single cell (Colorful Cell).  
326 Human embryonic kidney cells (HEK293) were transiently transfected with a plasmid that encodes differentially  
327 localized fluorescent proteins. The cells express tagBFP in nucleus, Cerulean in cell membrane, AzamiGreen in  
328 mitochondria, Citrine in Golgi body, mCherry in endoplasmic reticulum (ER), and iRFP670 in peroxisome (Fig  
329 5A). Cerulean, AzamiGreen and Citrine all have significant emissions in the green channel (Fig 5B), but they are  
330 excited at different efficiencies under 840nm and 1050nm [7,39], making it possible to distinguish them with the  
331 spectral signatures by collecting the green channel twice with the two excitations (Fig 5E). The 2PLSM  
332 excitation/emission setup is shown in Fig 5B. All the organelles were ambiguously mixed in the raw images  
333 especially in the green, red and far-red channels (Fig 5C). We assigned 7 clusters to the LUMoS algorithm to  
334 separate out the 6 fluorophores and background from the original 5-channel images. The algorithm reliably  
335 separated the raw data into 6 components that corresponded to the 6 organelles (Fig 5D) based on their shapes and  
336 locations inside the cell by comparing to the cell structure schematic (Fig 5A). The 3D unmixing results were  
337 shown in S3 Movie.



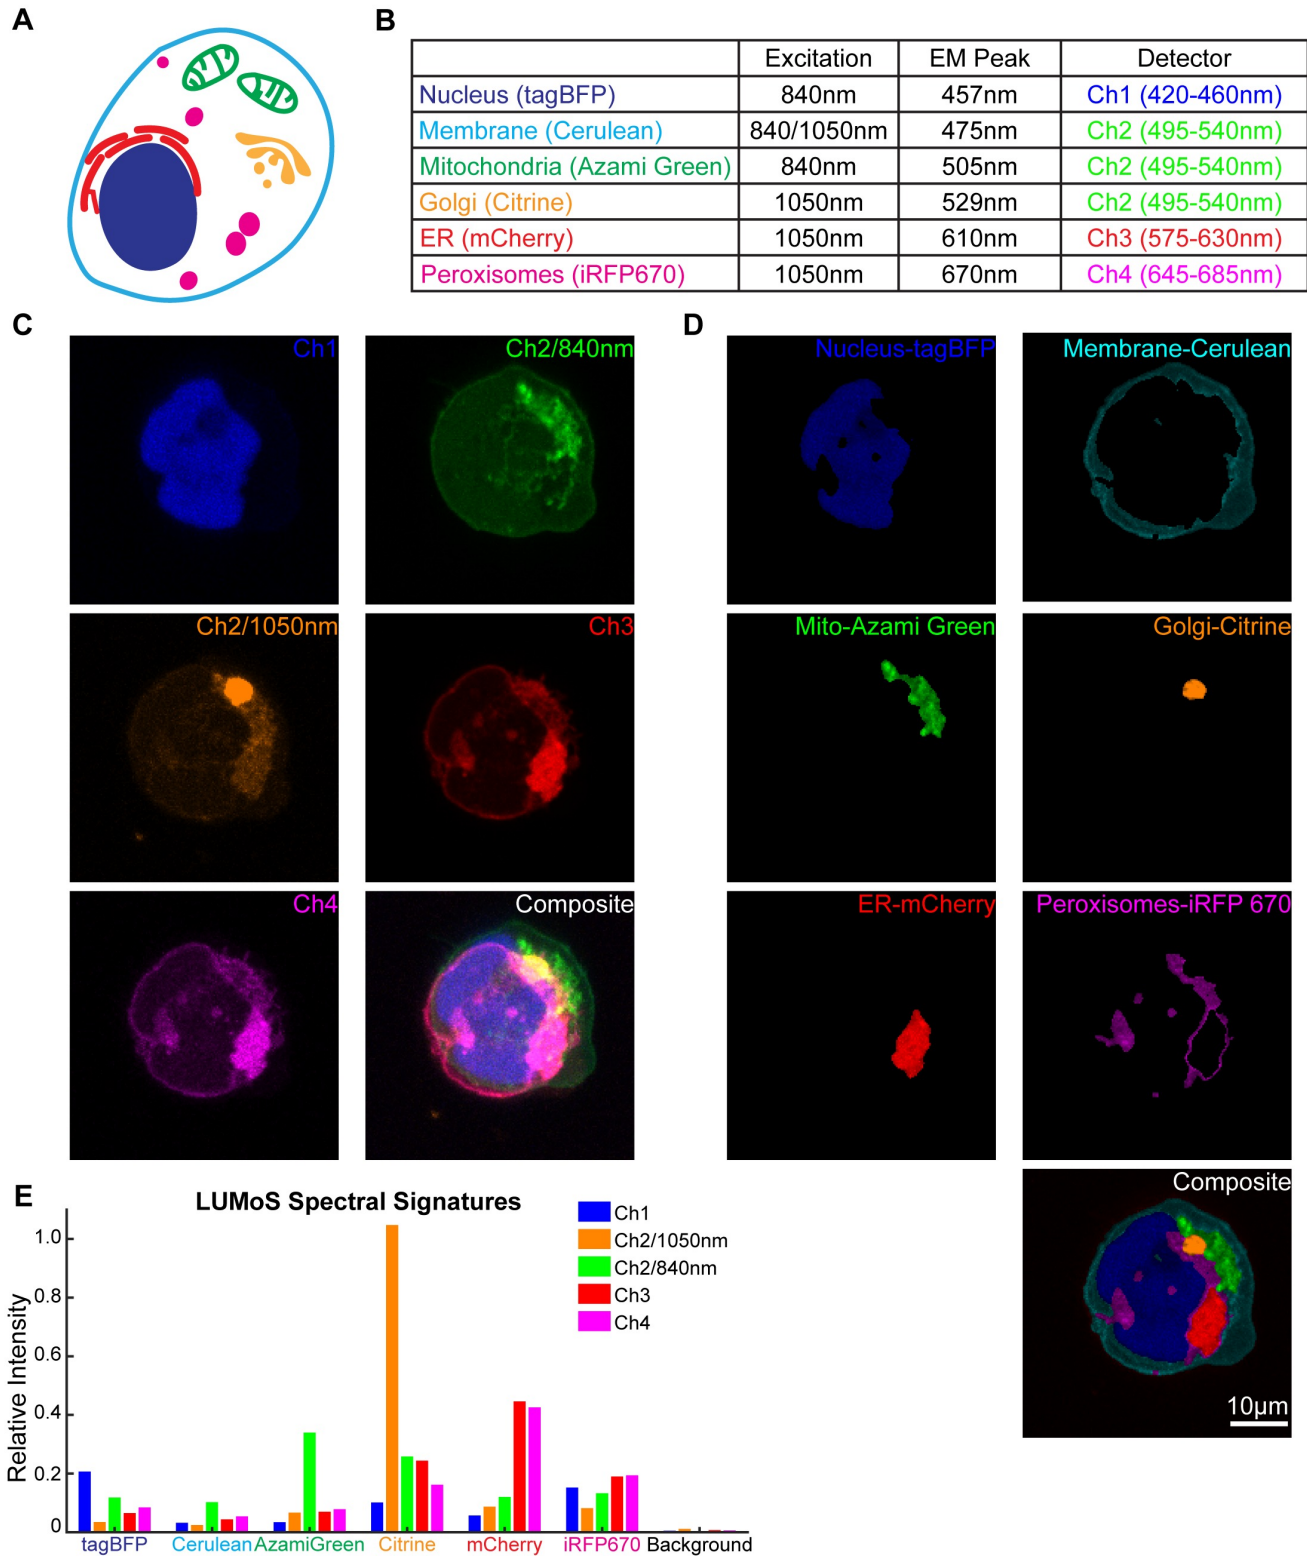

Fig 5. LUMoS unmixing of the Colorful Cell expressing 6 colors.

338  
339

340 (A) Schematic of the Colorful Cell expressing BFP in nucleus, Cerulean in cell membrane, AzamiGreen in  
341 mitochondria, Citrine in Golgi bodies, mCherry in endoplasmic reticulum, and iRFP 670 in peroxisomes. (B) The  
342 2PLSM system excitation and emission setups for imaging the Colorful Cell. 840nm and 1050nm sequential scan  
343 was conducted for the green channel (Ch2). Cerulean, AzamiGreen, and Citrine all emit significantly in the green  
344 channel. Cerulean can be excited well at both 840nm and 1050nm. AzamiGreen had more excitation at 1050nm,  
345 while Citrine excited better at 840nm. (C) The raw 2PLSM images of the Colorful Cell in the 4 channels with 2  
346 excitation wavelengths for the green channel (Ch2). All the fluorophores were mixed in the detection channels  
347 which made it difficult to reveal individual organelles. Images were maximum intensity projections of 3D z-  
348 stacks. (D) LUMoS separation results of the images in C. 6 distinct organelles were separated into individual  
349 images and a composite image of all 6 colors is shown on the bottom. Signals from background pixels were  
350 removed. (E) The relative intensities of each separated fluorophore by LUMoS in the detection channels.

## 351 **Colocalization analysis**

352 Unlike linear unmixing [10,18], one of the major assumptions of the LUMoS algorithm is that one pixel is  
353 uniquely labeled with one fluorophore, which is advantageous in the way that it provides unambiguous results  
354 especially in biological imaging (examples in Figs 3-5). However, in biology, one structure is often labeled with  
355 more than one fluorophores for colocalization studies. The structures with colocalized labeling will exhibit a  
356 distinct spectral signature, which is usually the combination of, but is different from, the individual fluorophore's  
357 spectrum. By leveraging this, LUMoS is able to treat the colocalized fluorophores as an additional cluster, and  
358 separate out the pixels with colocalization.

359 To demonstrate the flexibility of LUMoS to unmix and analyze images with colocalized labels, CD28  
360 virus labeled with Cerulean or YFP was used to transduce T cells either separately or together. The T cells were  
361 then mixed with non-labeled antigen-presenting cells (APCs) to form conjugations [34]. Cerulean or YFP was  
362 recruited and concentrated at the T-cell and APC contact sites. When T cells were transduced by Cerulean or YFP  
363 virus separately, the Cerulean and YFP were detected by the CFP and YFP channels respectively without bleed-



364 through (S4 Fig). When T cells were transduced by the mix of Cerulean and YFP viruses, some T cells expressed  
365 both Cerulean and YFP, while some only expressed one of them (Fig 6A). LUMoS was able to separate the raw  
366 images into Cerulean-only, YFP-only, and Cerulean+YFP colocalized channels (Fig 6B), by identifying distinct  
367 spectral signatures (Fig 6C). The calculated Mander's colocalization coefficients were 44.2% ( $M_{\text{Cerulean}}$ ) and  
368 38.2% ( $M_{\text{YFP}}$ ) [42]. In addition, although APCs were not labeled, they showed some autofluorescence in the raw  
369 images (Fig 6A indicated by white arrows, and S4 Fig). Similar as background noise (S6 FigD), autofluorescence  
370 was also identified and separated out by LUMoS (Fig 6B). The 3D unmixing results were shown in S5 Movie.

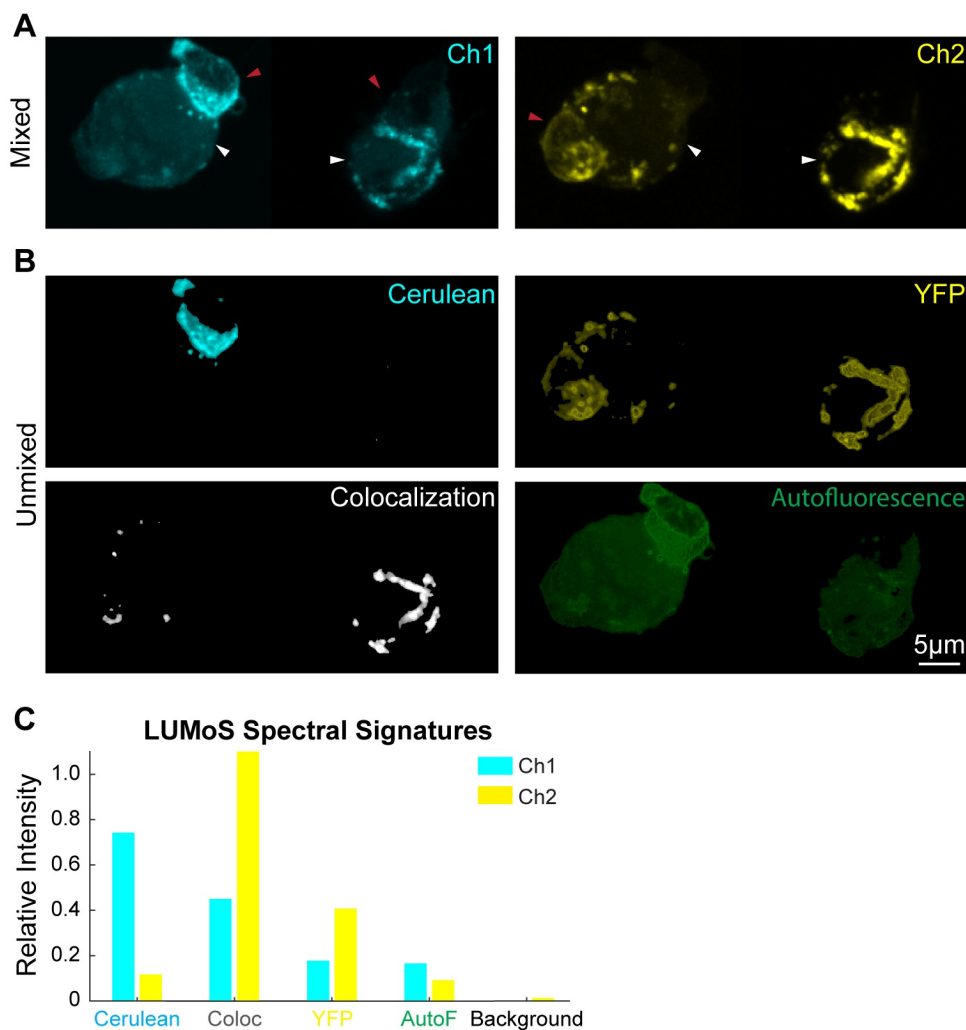

371

372 **Fig 6. LUMoS unmixing for colocalization analysis and autofluorescence removal.**

373 (A) The raw 2-channel 2PLSM images of T cells expressing Cerulean, YFP, or colocalized Cerulean and YFP.  
374 APCs are larger cells (pointed out by white arrows) than T cells (pointed out by red arrows), and APCs are non-  
375 labeled but autofluorescent. The fluorophores were concentrated at the conjugation sites between T cells and  
376 APCs. The images were z-projections of slices 6 to 17 of 3D z-stack images (S5 Movie). The left and right cells  
377 were imaged by two acquisitions and stitched, but with the same imaging conditions. (B) LUMoS separation  
378 results of the images in A. Autofluorescence and colocalization were split into separate channels while keeping  
379 pure Cerulean and YFP signals in their own channels. Signals from background pixels were separated and  
380 removed (S6 FigD). (C) The spectral signatures of each structures produced by LUMoS. Background and  
381 autofluorescence (AutoF) were identified as additional pixel groups with distinct signatures. Colocalization  
382 (Coloc) spots were separated out due to its different spectral signature from the Cerulean-only and YFP-only  
383 groups.

## 384 **Background and autofluorescence removal**

385 Most spectral unmixing tools [19,25,26,43] cannot distinguish background noise from real signals, while  
386 background removal is usually an essential prerequisite before unmixing to remove any signal not originating  
387 from the targeting signals [37]. Usually, if significant background noise exists, a simple math subtraction with a  
388 specific pixel threshold measured from non-structure background is performed, which can have the undesirable  
389 effect of removing real signals. The LUMoS method does not rely on a fixed numerical background subtraction,  
390 but rather the background is treated as a separate cluster with a spectral signature different from fluorophore  
391 expressing signals, so that background noise can be separated (S6 Fig) and removed from the sample signals (Figs  
392 3D, 4D, 5E, 6B). Therefore, the outputs of LUMoS are cleaned in the way that they are both spectral unmixed and  
393 background removed.

394 Autofluorescence is another a common but usually undesired signal in fluorescence microscopy in which  
395 regions with no label are fluorescent, often with higher intensity and broader emission spectrum than individual  
396 fluorophores [43]. Autofluorescence can come from some extracellular components or some cell types [44]. Non-

397 negative matrix factorization (NMF) is one spectral unmixing method that has been successfully applied for  
398 autofluorescence removal [22-24]. We here also demonstrated the unmixing performance of LUMoS when  
399 autofluorescence exists. In Fig 6A, the APCs in the sample were not stained but were autofluorescent. Similar to  
400 background, autofluorescence can be treated as an additional cluster if it exhibits a distinct spectral signature  
401 among all the fluorophores in the sample (Fig 6C). LUMoS was able to detect and remove autofluorescence in the  
402 image (Fig 6B). However, if the emission spectrum of autofluorescence is similar to other fluorophores in the  
403 image, the autofluorescence may be hard to separate out, so additional detection channels may be helpful to  
404 unmix the images in such cases.

## 405 **Synthetic data**

406 Lastly, we sought to test the limitations of LUMoS spectral unmixing by understanding the smallest  
407 structure size which can be detected, the maximum number of fluorophores the algorithm can separate, and the  
408 minimal quality of the input image that is required. As it is impractical to prepare a real-world biological sample  
409 with arbitrarily many fluorophores and precisely control both the size of a stained structure and the image SNR,  
410 we used synthetic images with those conditions computationally manipulated (Fig 2A-C). The synthetic data also  
411 provides us a ground truth to evaluate the performance of the algorithm.

## 412 **Cluster size**

413 As LUMoS is a  $k$ -means clustering based method, the algorithm assumes similar amount of data points in  
414 each cluster, and can disregard small but real clusters in order to minimize the total loss function [32]. This may  
415 be problematic when one fluorophore expressing structure is represented by significantly fewer pixels than the  
416 other structures, in which case the algorithm will misclassify the pixels belonging to a more abundant fluorophore  
417 to the minor structure, leading to an unmixing failure. Therefore, we first tested the robustness of the algorithm by  
418 changing the size of one fluorophore expressing structure while keeping the size of the rest of structures fixed.  
419 The number of fluorophores and SNR were fixed at 8 and 10 respectively. F1 score was used as the evaluation

420 metric as it can detect when the algorithm starts to erroneously combine fluorophores. The F1 score of the  
421 smallest cluster was used because the smallest cluster is inherently the most difficult for LUMoS to recognize and  
422 represents the worst-case scenario. Performance was monitored by setting the threshold for successfully unmixed  
423 samples at an F1 score of 0.9 or higher on the smallest cluster. The F1 score for the smallest cluster dropped off  
424 sharply when decreasing the cluster size ratio to below 0.01 (Fig 7, left), because at the tipping point, one part of a  
425 larger cluster was merged with the smallest cluster as the algorithm prioritized the improvements to other  
426 dominant clusters. This happened to all of the pixels in a small cluster at once so the drop off in accuracy was  
427 sudden. This can make LUMoS vulnerable when one fluorophore is expressed in much smaller structures than the  
428 rest.

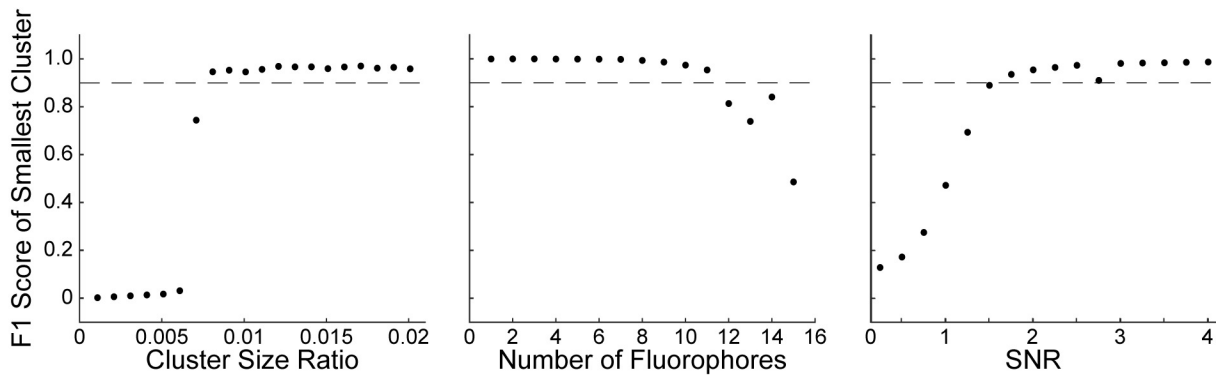

439 questions, we challenged the algorithm by increasing the number of fluorophores until it failed (Fig 7, middle).  
440 The cluster size and SNR were held constant at 0.2 and 10 respectively, and F1 score of the smallest cluster was  
441 measured. All fluorophores were assumed: 1) to be effectively excited, 2) to have the same shape and intensity  
442 scale of emission spectra with a tail into the longer wavelength, 3) to have emission peaks evenly distributed  
443 between 420nm and 685nm (Fig 2A). To mimic the variations in real-world imaging, the spectra of pixels  
444 belonging to one fluorophore were randomly shifted with a standard deviation of 10nm (S7 FigA). The imaging  
445 hardware was assumed to be the same as our system. LUMoS's performance was very stable until the number of  
446 fluorophores reached 12 (Fig 7, middle). At this point, the mean emission peaks were 37nm apart and there was  
447 72% emission spectra overlap. We also tested the performance of LUMoS on synthetic images of two  
448 fluorophores with varying differences in emission peaks (S7 FigB). The peak of the lower wavelength  
449 fluorophore was fixed while the peak of the higher wavelength fluorophore was varied to evaluate performance at  
450 different peak distances. Depending on where in the range of detectors they fell, the peaks of two fluorophores  
451 could be 10-15nm apart and the fluorophores could still be separated by LUMoS. This 10-15nm peak distance  
452 represents an 88-92% overlap in ideal emission spectra, which is very close to the standard deviation of 10nm  
453 with which each pixel's individual emission peak was sampled (S7 FigA). This variance in emission spectra from  
454 pixel to pixel is a key limiting factor in how similar the emission spectra of two fluorophores can be while  
455 maintaining separability with LUMoS. In real-world cases, the fluorochromes in a biology sample will not be as  
456 ideal as the simulated scenario. Careful selections of dyes with relatively separated emission spectra are always  
457 desired to gain the best unmixing results.

## 458 **Signal-to-noise ratio**

459 All spectral unmixing methods require a good image quality. LUMoS is a pixel-based method which  
460 makes it susceptible to any noise detected at the same time with real signals. Therefore, we tested the performance  
461 of LUMoS for unmixing images with different SNRs (Fig 7, right). The cluster size ratio and number of  
462 fluorophores were fixed at 0.2 and 8, while F1 score of the smallest cluster was evaluated at different SNRs. The  
463 simulated data showed that LUMoS was very robust when the SNR was above 2. For images with SNRs around

464 that level or lower, LUMoS will likely have low performance on the raw data. Even with ideal spectral signatures,  
465 any pixel-level unmixing techniques such as LUMoS will fail when the observed spectral signature is  
466 contaminated by high noise. In cases where the image to be unmixed is prohibitively noisy, denoising pre-  
467 processing techniques or an unmixing method that can take spatial information into account may be desired.

## 468 **ImageJ PlugIn**

469 Although many spectral unmixing algorithms have been published, so far, easy-to-use open source tool  
470 options are still limited to biologists. Walter published an ImageJ/Fiji spectral unmixing plugin [45] based on  
471 linear unmixing, which requires either a reference image with well-separated structures or a separate preparation  
472 of reference samples for each fluorophore. Those requirements are usually hard to achieve, and the PlugIn also  
473 involves laborious and time-consuming manual ROI labeling. Another unmixing PlugIn available is based on  
474 spectral deconvolution [46], but also requires ROI selections of areas with only one type of fluorophore. We here  
475 developed an ImageJ/Fiji PlugIn [47,48] of the LUMoS algorithm to facilitate the easy implementation of this  
476 flexible method for spectral unmixing, background removal, and colocalization analysis. No ROI selections,  
477 spectra information, or single stain of samples are required. The only input parameter is the number of  
478 fluorophores in the sample. The PlugIn is available from the authors or through ImageJ PlugIn Repository.  
479 Detailed user guides are provided on our website ([https://www.urmc.rochester.edu/research/multiphoton/image-](https://www.urmc.rochester.edu/research/multiphoton/image-analysis/spectral-unmixing.aspx)  
480 [analysis/spectral-unmixing.aspx](https://www.urmc.rochester.edu/research/multiphoton/image-analysis/spectral-unmixing.aspx)).

## 481 **Discussion**

482 Over the past decade, a wide variety of high-performance fluorophores have been developed [49,50].  
483 These reagents exhibit a broad range of physical and spectral properties [51], are capable of targeting proteins or  
484 peptides in living or fixed cells [40], and can also be used as indicators of biological dynamics [52]. Combining  
485 two or more fluorescent probes offers significantly a higher level of information [25,53,54], but may also lead to

486 signal crossover [9]. Current spectral unmixing tools solve this problem to some extent, but their applicability is  
487 usually limited. In this paper, we suggested and experimentally examined an approach by using *k*-means  
488 clustering based unsupervised machine learning as a more flexible alternative to separating mixed images blindly.

489 There are two major issues with current unmixing tools available to biologists which have highly  
490 restricted the spectral resolutions that can be achieved by fluorescence microscopy especially the 2PLSM. Firstly,  
491 unmixing methods based on linear inversion calculations, such as linear unmixing [9,11,12,37,55], spectral  
492 deconvolution [25,46] and similarity unmixing [26], rely heavily on the cumbersome pre-measurements of  
493 emission spectra either through separately recording the spectra of all fluorochromes [26] or manually selecting  
494 ROIs with pure labels in the image [9]. Background and autofluorescence, if present, also need to be defined  
495 spectrally and treated as additional spectra [11,55], which are even harder to measure or estimate. LUMoS, as it  
496 does not directly calculate the abundances of fluorophores, is a completely “blind” unmixing process, and is  
497 therefore, much easier to implement and free from those restrictions of acquisition conditions. When background  
498 and autofluorescence are present in the sample, additional clusters could be added, and those undesired signals  
499 could be separated and removed (Fig 6). Secondly, linear unmixing, Non-negative Matrix Factorization (NMF)  
500 [20,56], deconvolution, and Principle Component Analysis (PCA) [57] all require determined  
501 ( $N_{\text{fluorophores}}=N_{\text{channels}}$ ) or over-determined ( $N_{\text{fluorophores}}<N_{\text{channels}}$ ) image acquisition systems, greatly restricting the  
502 total number of fluorophores that can be imaged by the hardware design. Although Independent Component  
503 Analysis (ICA) does not intrinsically require less fluorophores than detectors, its success for spectral unmixing in  
504 fluorescence microscopy has been limited to relatively few independent sources which are usually same or fewer  
505 than the number of detectors [58-60]. As LUMoS can be set to create an arbitrary number of clusters for an image,  
506 it can be used in under-determined situations ( $N_{\text{fluorophores}}>N_{\text{channels}}$ ) for expanding the capabilities of an imaging  
507 system (Figs 4 and 5). Moreover, as the readout noise increases with the number of detection channels used  
508 [37,58], LUMoS can achieve the high quality unmixing results with as few channels as possible to minimize the  
509 readout noise.

510 Similar but more complicated clustering based methods have been introduced and developed in the field  
511 of satellite imaging [29,61,62]. Remote sensing image unmixing is similar to fluorescence image unmixing in

512 many ways, and many unmixing ideas commonly used for microscopy imaging were initially introduced in  
513 remote sensing [37]. The ultimate goal of both imaging modalities' unmixing is to decompose the spectral  
514 signature of mixed signals into a set of endmembers and corresponding abundances [38,63]. However, the  
515 uniqueness of fluorescence microscopy makes its spectral unmixing task different from remote sensing. First and  
516 foremost, the number and type of fluorophores (endmembers) are known in advance in microscopy, which offers  
517 a great advantage and simplicity of using clustering algorithms such as  $k$ -means for fluorescence image unmixing.  
518 Most of the time, the first step of remote sensing image unmixing is to determine endmember [38,64], and many  
519 of the advanced unmixing algorithms have been focused on how to better estimate the number and characteristics  
520 of endmembers, such as adaptive possibilistic clustering [62] and neural network autoencoder [65]. Second, due  
521 to the chemical mixtures of landscape objects, the abundance of one pixel from a satellite image normally  
522 comprises fractions of each endmembers, thus remote sensing image unmixing methods output abundances for  
523 each pixel as fractions of different chemical components [38,63]. However, in fluorescence microscopy,  
524 biologists usually assume a distinct labeling of a structure by one specific fluorophore, unless colocalized labeling  
525 was designed. The goal of fluorescence image unmixing is more towards unambiguously distinguishing each  
526 labeled structure rather than decomposing each pixel into many different chemical components. Therefore, using  
527 classification based hard clustering, such as LUMoS, by assuming one pixel per fluorophore is more appropriate  
528 in the field of fluorescence imaging and the results of which are more interpretable for biologists. Third, remote  
529 sensing images have hundreds of spectral bands which is usually much more than the number of endmembers,  
530 making linear algebra based unmixing methods, such as linear unmixing, NMF, and deconvolution, better suited  
531 [38,63,64]. Because fluorescence microscopes have much fewer detectors (usually  $\leq 4$ ), many unmixing methods  
532 applied for remote sensing are insufficient for fluorescence imaging with potentially more fluorophores than  
533 detectors. In considerations of those features of fluorescence imaging, we applied  $k$ -means clustering as a simple,  
534 easy-to-use, and flexible method for microscopy image unmixing.

535 The implications of  $k$ -means clustering are usually limited by the difficulties in choosing an optimal  
536 number of clusters, " $k$ " [32,66]. However, in the case of fluorescence microscopy, " $k$ " is known and determined  
537 by the number of fluorochromes used, making  $k$ -means clustering a well-suited method for spectral unmixing.



538 Usually, the “ $k$ ” is set to be the total number of fluorophores plus one (considering the background noise)  
539 (examples in Figs 3-5). When special circumstances happen, options are available to optimize the “ $k$ ” to tailor  
540 LUMoS for different cases. For example, when there are known colocalization labeling or autofluorescence  
541 structures (Fig 6), additional clusters could be added by considering colocalization and autofluorescence as  
542 distinct “fluorophores”. When applying LUMoS, carefully examining the image data to better determine “ $k$ ” in  
543 advance may improve the unmixing results.

544 There are also limitations of our algorithm, especially when unique circumstances are associated with the  
545 imaging data. As demonstrated in the simulations, our approach may cease to be useful when it misclassifies a  
546 significant portion of the pixels belonging to a fluorophore of interest. This can occur when there are relatively  
547 unbalanced structure sizes, significantly overlapping emission spectra, and a low SNR. Additionally, although  
548 considering the information of nearby pixels by using a median filter, LUMoS still does not take any spatial  
549 information at biological structure level into account so its clustering ability is limited to classifying individual  
550 pixels rather than whole structures as some other methods attempt [67,68]. LUMoS specifically assumes the  
551 abundance of each fluorophores is binary at pixel level, which produces unambiguous classification of individual  
552 fluorophores. If there is colocalization at structure scale, for example one structure labeled with more than one  
553 fluorophore, the colocalization group can be treated as an additional cluster to be separated and analyzed (Fig 6).  
554 However, implicit in our unmixing algorithm is the assumption that a pixel represents an exclusive single label  
555 without considering nano-scale colocalization due to the imaging spatial resolution limitations. This assumption is  
556 valid for spatially well-dispersed fluorescent structures relative to the imaging resolution, but may not hold when  
557 two labeled structures are contacting or too close to each other. We expect future improvements by adding the  
558 options of fuzzy clustering [69,70] or overlapping  $k$ -means [71] to extend the flexibility of LUMoS when there  
559 are nano-scale colocalization considerations.

560 In conclusion, we presented a blind and flexible tool for fluorescence image spectral unmixing —  
561 LUMoS. Both experimental and synthetic results demonstrated its ability to robustly separate mixed fluorophores  
562 in terms of the quality of results and ability to converge in a variety of scenarios. The LUMoS method has also  
563 greatly expanded the fluorophore options beyond the number limit of detectors and excitation lasers. These

564 qualities make LUMoS a simple, general, and reliable spectral unmixing approach to quickly apply to any  
565 fluorescence images. Last but not least, an optimal strategy for spectral unmixing should always combine image  
566 processing algorithms with careful dye selections and rigorous image acquisitions. LUMoS can be coupled with  
567 spectral imaging or other hardware designs to yield excellent multi-color imaging results, and will offer new  
568 avenues for understanding the complex biological organizations.

## 569 **Acknowledgement**

570 We thank the Multiphoton Research Core Facility at University of Rochester Medical Center for providing the  
571 two-photon microscope system. We also thank Matthew Cochran at the Flow Cytometry Shared Resource at  
572 University of Rochester Medical Center for generously providing some of the fluorescence particles used in the  
573 study.

574

575

## References

- 576 1. Denk W, Strickler JH, Webb WW. Two-photon laser scanning fluorescence microscopy. *Science*.  
577 1990;248: 73–76. doi:10.1126/science.2321027
- 578 2. Svoboda K, Yasuda R. Principles of two-photon excitation microscopy and its applications to  
579 neuroscience. *Neuron*. 2006;50: 823–839. doi:10.1016/j.neuron.2006.05.019
- 580 3. Gao Y-R, Drew PJ. Effects of voluntary locomotion and calcitonin gene-related peptide on the  
581 dynamics of single dural vessels in awake mice. *J Neurosci*. 2016;36: 2503–2516.  
582 doi:10.1523/JNEUROSCI.3665-15.2016
- 583 4. Gao Y-R, Greene SE, Drew PJ. Mechanical restriction of intracortical vessel dilation by brain  
584 tissue sculpts the hemodynamic response. *NeuroImage*. 2015;115: 162–176.  
585 doi:10.1016/j.neuroimage.2015.04.054
- 586 5. Benninger RKP, Piston DW. Two-photon excitation microscopy for the study of living cells and  
587 tissues. *Current Protocols in Cell Biology*. 2013;59: 4.11.1–4.11.24.  
588 doi:10.1002/0471143030.cb0411s59
- 589 6. Xu C, Webb WW. Measurement of two-photon excitation cross sections of molecular  
590 fluorophores with data from 690 to 1050 nm. *J Opt Soc Am B*. 1996;13: 481–491.  
591 doi:10.1364/JOSAB.13.000481
- 592 7. Drobizhev M, Tillo S, Makarov NS, Hughes TE, Rebane A. Absolute two-photon absorption  
593 spectra and two-photon brightness of orange and red fluorescent proteins. *J Phys Chem B*.  
594 2009;113: 855–859. doi:10.1021/jp8087379
- 595 8. Bestvater F, Spiess E, Stobrawa G, Hacker M, Feurer T, Porwol T, et al. Two-photon  
596 fluorescence absorption and emission spectra of dyes relevant for cell imaging. *J Microsc*.  
597 2002;208: 108–115. doi:10.1046/j.1365-2818.2002.01074.x
- 598 9. Dickinson ME, Bearman G, Tille S, Lansford R, Fraser SE. Multi-spectral imaging and linear  
599 unmixing add a whole new dimension to laser scanning fluorescence microscopy. *BioTechniques*.  
600 2001;31: 1272–1278. doi:10.2144/01316bt01
- 601 10. Lansford R, Bearman G, Fraser SE. Resolution of multiple green fluorescent protein color  
602 variants and dyes using two-photon microscopy and imaging spectroscopy. *J Biomed Opt*.  
603 2001;6: 311–318. doi:10.1117/1.1383780
- 604 11. Neher R, Neher E. Optimizing imaging parameters for the separation of multiple labels in a  
605 fluorescence image. *J Microsc*. 2004;213: 46–62. doi:10.1111/j.1365-2818.2004.01262.x
- 606 12. Zimmermann T, Rietdorf J, Girod A, Georget V, Pepperkok R. Spectral imaging and linear un-  
607 mixing enables improved FRET efficiency with a novel GFP2–YFP FRET pair. *FEBS Letters*.  
608 2002;531: 245–249. doi:10.1016/S0014-5793(02)03508-1

- 609 13. Ecker RC, de Martin R, Steiner GE, Schmid JA. Application of spectral imaging microscopy in  
610 cytomics and fluorescence resonance energy transfer (FRET) analysis. *Cytometry A*. 2004;59A:  
611 172–181. doi:10.1002/cyto.a.20053
- 612 14. Nadrigny F, Rivals I, Hirrlinger PG, Koulakoff A, Personnaz L, Vernet M, et al. Detecting  
613 fluorescent protein expression and co-localisation on single secretory vesicles with linear spectral  
614 unmixing. *Eur Biophys J*. 2006;35: 533–547. doi:10.1007/s00249-005-0040-8
- 615 15. Wildanger D, Vicidomini G, Bückers J, Kastrup L, Hell SW. Simultaneous multi-lifetime multi-  
616 color STED imaging for colocalization analyses. *Opt Express*. 2011;19: 3130–3143.  
617 doi:10.1364/OE.19.003130
- 618 16. Valm AM, Oldenbourg R, Borisy GG. Multiplexed spectral imaging of 120 different fluorescent  
619 Labels. *PLoS ONE*. 2016;11: e0158495. doi:10.1371/journal.pone.0158495
- 620 17. Tsurui H, Nishimura H, Hattori S, Hirose S, Okumura K, Shirai T. Seven-color fluorescence  
621 imaging of tissue samples based on fourier spectroscopy and singular value decomposition. *J*  
622 *Histochem Cytochem*. 2000;48: 653–662. doi:10.1177/002215540004800509
- 623 18. Zimmermann T, Marrison J, Hogg K, O’Toole P. Clearing up the signal: spectral imaging and  
624 linear unmixing in fluorescence microscopy. *Methods Mol Biol*. 2014. pp. 129–148.  
625 doi:10.1007/978-1-60761-847-8\_5
- 626 19. Neher RA, Mitkovski M, Kirchhoff F, Neher E, Theis FJ, Zeug A. Blind source separation  
627 techniques for the decomposition of multiply labeled fluorescence images. *Biophysical Journal*.  
628 2009;96: 3791–3800. doi:10.1016/j.bpj.2008.10.068
- 629 20. Pengo T, Muñoz-Barrutia A, Zudaire I, Ortiz-de-Solorzano C. Efficient blind spectral unmixing  
630 of fluorescently labeled samples using multi-layer non-negative matrix factorization. *PLoS ONE*.  
631 2013;8: e78504. doi:10.1371/journal.pone.0078504
- 632 21. Lee DD, Seung HS. Learning the parts of objects by non-negative matrix factorization. *Nature*.  
633 1999;401: 788–791. doi:10.1038/44565
- 634 22. Montcuquet A-S, Hervé L, Navarro F, Dinten J-M, Mars JI. In vivo fluorescence spectra  
635 unmixing and autofluorescence removal by sparse nonnegative matrix factorization. *IEEE Trans*  
636 *Biomed Eng*. 2011;58: 2554–2565. doi:10.1109/TBME.2011.2159382
- 637 23. Huang S, Zhao Y, Qin B. Two-hierarchical nonnegative matrix factorization distinguishing the  
638 fluorescent targets from autofluorescence for fluorescence imaging. *Biomed Eng Online*.  
639 2015;14: 1–19. doi:10.1186/s12938-015-0107-4
- 640 24. Qin B, Hu C, Huang S. Target/background classification regularized nonnegative matrix  
641 factorization for fluorescence unmixing. *IEEE Trans Instrum Meas*. 2016;65: 874–889.  
642 doi:10.1109/TIM.2016.2516318
- 643 25. Ricard C, Debarbieux FC. Six-color intravital two-photon imaging of brain tumors and their  
644 dynamic microenvironment. *Front Cell Neurosci*. 2014;8: 57. doi:10.3389/fncel.2014.00057

- 645 26. Rakhymzhan A, Leben R, Zimmermann H, Günther R, Mex P, Reismann D, et al. Synergistic  
646 strategy for multicolor two-photon microscopy: application to the analysis of germinal center  
647 reactions in vivo. *Sci Rep.* 2017;7: 7101. doi:10.1038/s41598-017-07165-0
- 648 27. Hinton GE, Sejnowski TJ, Poggio TA. *Unsupervised learning.* 1st ed. Cambridge: MIT Press;  
649 1999.
- 650 28. Kapoor A, Singhal A. A comparative study of K-Means, K-Means++ and Fuzzy C-Means  
651 clustering algorithms. 2017 3rd IEEE International Conference on Computational Intelligence &  
652 Communication Technology. 2017. pp. 1–6. doi:10.1109/CIACT.2017.7977272
- 653 29. Ishidoshiro N, Yamaguchi Y, Noda S, Asano Y, Kondo T, Kawakami Y, et al. Geological  
654 mapping by combining spectral unmixing and cluster analysis for hyperspectral data.  
655 *International Archives of the Photogrammetry, Remote Sensing and Spatial Information Sciences.*  
656 2016. pp. 431–435. doi:10.5194/isprs-archives-XLI-B8-431-2016
- 657 30. Torrecilla E, Stramski D, Reynolds RA, Millán-Núñez E, Piera J. Cluster analysis of  
658 hyperspectral optical data for discriminating phytoplankton pigment assemblages in the open  
659 ocean. *Remote Sensing of Environment.* 2011;115: 2578–2593. doi:10.1016/j.rse.2011.05.014
- 660 31. Bunting P, Lucas RM, Jones K, Bean AR. Characterisation and mapping of forest communities  
661 by clustering individual tree crowns. *Remote Sensing of Environment.* 2010;114: 2536–2547.  
662 doi:10.1016/j.rse.2010.05.030
- 663 32. Coates A, Ng AY. Learning feature representations with k-means. In: Montavon G, Orr GB,  
664 Muller KR, editors. *Neural Networks: Tricks of the Trade.* Berlin, Heidelberg: Springer; 2012.  
665 pp. 561–580. doi:10.1007/978-3-642-35289-8\_30
- 666 33. Sladitschek HL, Neveu PA. MXS-Chaining: a highly efficient cloning platform for imaging and  
667 flow cytometry approaches in mammalian systems. *PLoS ONE.* 2015;10: e0124958.  
668 doi:10.1371/journal.pone.0124958
- 669 34. Sanchez-Lockhart M, Graf B, Miller J. Signals and sequences that control CD28 localization to  
670 the central region of the immunological synapse. *The Journal of Immunology.* 2008;181: 7639–  
671 7648. doi:10.4049/jimmunol.181.11.7639
- 672 35. Mohamad IB, Usman D. Standardization and its effects on K-means clustering algorithm.  
673 *Research Journal of Applied Sciences, Engineering and Technology.* 2013;6: 3299–3303.  
674 doi:10.19026/rjaset.6.3638
- 675 36. Arthur D, Vassilvitskii S. k-means++: the advantages of careful seeding. *Proceedings of the*  
676 *Eighteenth Annual ACM-SIAM Symposium on Discrete Algorithms.* 2007. pp. 1027–1035.
- 677 37. Zimmermann T. Spectral imaging and linear unmixing in light microscopy. *Adv Biochem Eng*  
678 *Biotechnol.* 2005;95: 245–265. doi: 10.1007/b102216
- 679 38. Keshava N, Mustard JF. Spectral unmixing. *IEEE Signal Processing Magazine.* 2002;19: 44–57.  
680 doi:10.1109/79.974727

- 681 39. Ricard C, Arroyo ED, He CX, Portera-Cailliau C, Lepousez G, Canepari M, et al. Two-photon  
682 probes for in vivo multicolor microscopy of the structure and signals of brain cells. *Brain Struct*  
683 *Funct.* 2018;223: 3011–3043. doi:10.1007/s00429-018-1678-1
- 684 40. Huang H, Zhang P, Qiu K, Huang J, Chen Y, Ji L, et al. Mitochondrial dynamics tracking with  
685 two-photon phosphorescent terpyridyl iridium(III) complexes. *Sci Rep.* 2016;6: 20887.  
686 doi:10.1038/srep20887
- 687 41. Albota MA, Xu C, Webb WW. Two-photon fluorescence excitation cross sections of  
688 biomolecular probes from 690 to 960 nm. *Appl Opt.* 1998;37: 7352–7356.  
689 doi:10.1364/AO.37.007352
- 690 42. Dunn KW, Kamocka MM, McDonald JH. A practical guide to evaluating colocalization in  
691 biological microscopy. *Am J Physiol Cell Physiol.* 2011;300: C723–C742.  
692 doi:10.1152/ajpcell.00462.2010
- 693 43. Croce AC, Bottiroli G. Autofluorescence spectroscopy and imaging: a tool for biomedical  
694 research and diagnosis. *European Journal of Histochemistry.* 2014;58: 2461.  
695 doi:10.4081/ejh.2014.2461
- 696 44. Monici M. Cell and tissue autofluorescence research and diagnostic applications. *Biotechnology*  
697 *Annual Review.* 2005;11: 227–256. doi:10.1016/S1387-2656(05)11007-2
- 698 45. Walter J. Spectral Unmixing Plugins. 2004. Database:  
699 <https://imagej.nih.gov/ij/plugins/index.html>. Available from:  
700 <https://imagej.nih.gov/ij/plugins/spectral-unmixing.html>.
- 701 46. Gammon ST, Leevy MW, Gross S, George GW, Piwnica-Worms D. Spectral unmixing of  
702 multicolored bioluminescence emitted from heterogeneous biological sources. *Anal Chem.*  
703 2006;78: 1520–1527. doi:10.1021/ac051999h
- 704 47. Rueden CT, Schindelin J, Hiner MC, DeZonia BE, Walter AE, Arena ET, et al. ImageJ2: ImageJ  
705 for the next generation of scientific image data. *BMC Bioinformatics.* 2017;18: 529.  
706 doi:10.1186/s12859-017-1934-z
- 707 48. Schindelin J, Arganda-Carreras I, Frise E, Kaynig V, Longair M, Pietzsch T, et al. Fiji: an open-  
708 source platform for biological-image analysis. *Nat Methods.* 2012;9: 676–682.  
709 doi:10.1038/nmeth.2019
- 710 49. Lakowicz JR. Fluorophores. *Principles of Fluorescence Spectroscopy.* 2nd ed. Boston, MA:  
711 Springer, Boston, MA; 1999. pp. 63–93.
- 712 50. Shaner NC, Steinbach PA, Tsien RY. A guide to choosing fluorescent proteins. *Nat Methods.*  
713 2005;2: 905–909. doi:10.1038/nmeth819
- 714 51. Luker KE, Pata P, Shemiakina II, Pereverzeva A, Stacer AC, Shcherbo DS, et al. Comparative  
715 study reveals better far-red fluorescent protein for whole body imaging. *Sci Rep.* 2015;5: 10332.  
716 doi:10.1038/srep10332



- 717 52. Akemann W, Sasaki M, Mutoh H, Imamura T, Honkura N, Knöpfel T. Two-photon voltage  
718 imaging using a genetically encoded voltage indicator. *Sci Rep.* 2013;3: 2231.  
719 doi:10.1038/srep02231
- 720 53. Mahou P, Zimmerley M, Loulier K, Matho KS, Labroille G, Morin X, et al. Multicolor two-  
721 photon tissue imaging by wavelength mixing. *Nat Methods.* 2012;9: 815–818.  
722 doi:10.1038/nmeth.2098
- 723 54. Dunn KW, Sandoval RM, Kelly KJ, Dagher PC, Tanner GA, Atkinson SJ, et al. Functional  
724 studies of the kidney of living animals using multicolor two-photon microscopy. *Am J Physiol*  
725 *Cell Physiol.* 2002;283: C905–C916. doi:10.1152/ajpcell.00159.2002
- 726 55. Zimmermann T, Rietdorf J, Pepperkok R. Spectral imaging and its applications in live cell  
727 microscopy. *FEBS Letters.* 2003;546: 87–92. doi:10.1016/S0014-5793(03)00521-0
- 728 56. Gobinet C, Perrin E, Huez R. Application of non-negative matrix factorization to fluorescence  
729 spectroscopy. 2004 12th European Signal Processing Conference. 2004. pp. 1095–1098.
- 730 57. Pu H, He W, Zhang G, Bin Zhang, Liu F, Zhang Y, et al. Separating structures of different  
731 fluorophore concentrations by principal component analysis on multispectral excitation-resolved  
732 fluorescence tomography images. *Biomed Opt Express.* 2013;4: 1829–1845.  
733 doi:10.1364/BOE.4.001829
- 734 58. Dao L, Lucotte B, Glancy B, Chang LC, Hsu LY, Balaban RS. Use of independent component  
735 analysis to improve signal-to-noise ratio in multi-probe fluorescence microscopy. *J Microsc.*  
736 2014;256: 133–144. doi:10.1111/jmi.12167
- 737 59. Pu H, Zhang G, He W, Liu F, Guang H, Zhang Y, et al. Resolving fluorophores by unmixing  
738 multispectral fluorescence tomography with independent component analysis. *Phys Med Biol.*  
739 2014;59: 5025–5042. doi:10.1088/0031-9155/59/17/5025
- 740 60. Buehler A, Razansky D, Glatz J, Deliolanis NC, Ntziachristos V. Blind source unmixing in multi-  
741 spectral optoacoustic tomography. *Opt Express.* 2011;19: 3175–3184. doi:10.1364/OE.19.003175
- 742 61. Kwong JD, Messinger DW, Middleton WD. Hyperspectral clustering and unmixing for studying  
743 the ecology of state formation and complex societies. *SPIE Proc.* 2009; 7457: p. 74570E.  
744 doi:10.1117/12.826354
- 745 62. Xenaki SD, Koutroumbas KD, Rontogiannis AA. A novel adaptive possibilistic clustering  
746 algorithm. *IEEE Trans Fuzzy Syst.* 2016;24: 791–810. doi:10.1109/TFUZZ.2015.2486806
- 747 63. Keshava N. A survey of spectral unmixing algorithms. *Lincoln Lab J.* 2003;14: 44–78.
- 748 64. Bateson A, Curtiss B. A method for manual endmember selection and spectral unmixing. *Remote*  
749 *Sensing of Environment.* 1996;55: 229–243.
- 750 65. Palsson B, Sigurdsson J, Sveinsson JR, Ulfarsson MO. Hyperspectral unmixing using a neural  
751 network autoencoder. *IEEE Access.* 2018;6: 25646–25656. doi:10.1109/ACCESS.2018.2818280

- 752 66. Zhao W, Liu Q, Lv Y, Qin B. Texture variation adaptive image denoising with nonlocal PCA.  
753 IEEE Trans on Image Process. 2019;28: 5537–5551. doi:10.1109/TIP.2019.2916976
- 754 67. Iordache M-D, Bioucas-Dias JM, Plaza A. Total variation spatial regularization for sparse  
755 hyperspectral unmixing. IEEE Trans Geosci Remote Sensing. 2012;50: 4484–4502.  
756 doi:10.1109/TGRS.2012.2191590
- 757 68. Megjhani M, de Sampaio PC, Carstens JL, Kalluri R, Roysam B. Morphologically constrained  
758 spectral unmixing by dictionary learning for multiplex fluorescence microscopy. Bioinformatics.  
759 2017;33: 2182–2190. doi: 10.1093/bioinformatics/btx108
- 760 69. Bezdek JC. Pattern recognition with fuzzy objective function algorithms. 1st ed. Norwell, MA:  
761 Plenum Press; 1981.
- 762 70. Zare A, Gader P. Piece-wise convex spatial-spectral unmixing of hyperspectral imagery using  
763 possibilistic and fuzzy clustering. Taipei, Taiwan: IEEE; 2011. pp. 741–746.  
764 doi:10.1109/FUZZY.2011.6007622
- 765 71. Khanmohammadi S, Adibeig N, Shanehbandy S. An improved overlapping k-means clustering  
766 method for medical applications. Expert Systems with Applications. 2017;67: 12–18.  
767 doi:10.1016/j.eswa.2016.09.025
- 768



769 **Supporting information**

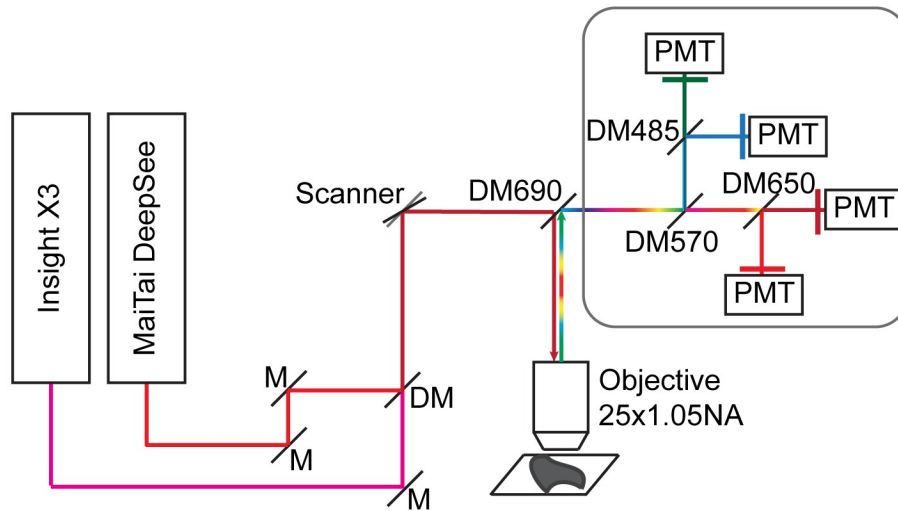

770

771 **S1 Fig. Two-photon system schematic.**

772 The system (Olympus FVMPE-RS) was equipped with two two-photon lasers and four PMTs. 25× water  
773 immersion objective was used. M: mirror, DM: dichroic mirror, Scanner: galvanometer scanner, PMT:  
774 photomultiplier tube. The Blue/Green (420-460nm/495-540nm), and Red/fRed (575-630nm/645-685nm) filter  
775 cubes setup is shown.

776

777 **S2 Movie. BPAE cells 3D image unmixing results.**

778 Z-stack of BPAE cells 2PLSM images shown in Fig 3. *Left*, raw image. *Right*, LUMoS unmixed image.

779

780 **S3 Movie. Colorful Cell 3D image unmixing results.**

781 Z-stack of Colorful Cell cells 2PLSM images shown in Fig 5. *Left*, raw image. *Right*, LUMoS unmixed image.

782

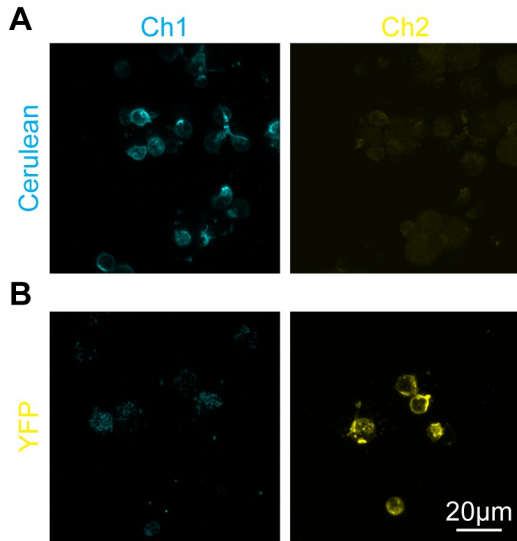

783

784 **S4 Fig. Single stained cell preparations of the colocalization example.**

785 T cells only transduced with Cerulean or YFP virus mixed with APCs and imaged with the same conditions as in  
786 Fig 6. (A) Cells transduced with Cerulean expressing virus. Cerulean signals showed only in CFP channel (Ch1).  
787 (B) Cells transduced with YFP virus. YFP signals were only detected by the YFP channel (Ch2). There was no  
788 cross-talk between CFP and YFP channels. APCs showed weak autofluorescence.

789

790 **S5 Movie. Cerulean and YFP colocalization 3D image unmixing results.**

791 Z-stack of T cells transduced with Cerulean and YFP virus shown in Fig 6. *Top*, raw image. *Bottom*, LUMoS  
792 unmixed image.

793

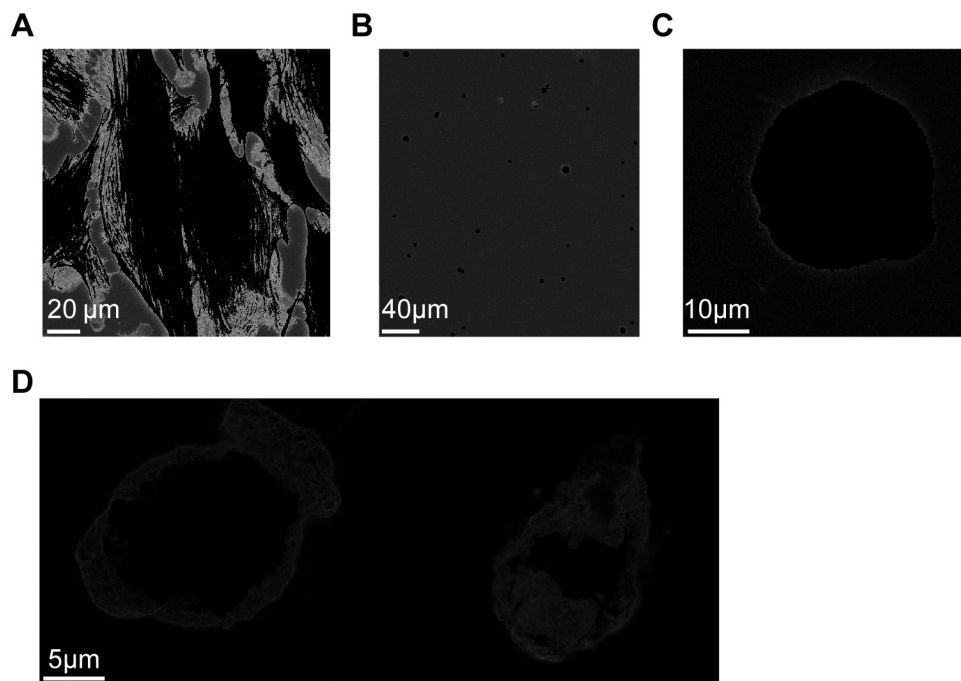

794

795 **S6 Fig. Separated background noise cluster images.**

796 (A) The separated background image by LUMoS of the BPAC cells image in Fig 3. (B) The separated background  
797 image by LUMoS of the multi-color beads image in Fig 4. (C) The separated background image by LUMoS of the  
798 colorful cell image in Fig 5. (D) The separated background image of the imaged cells in Fig 6.

799

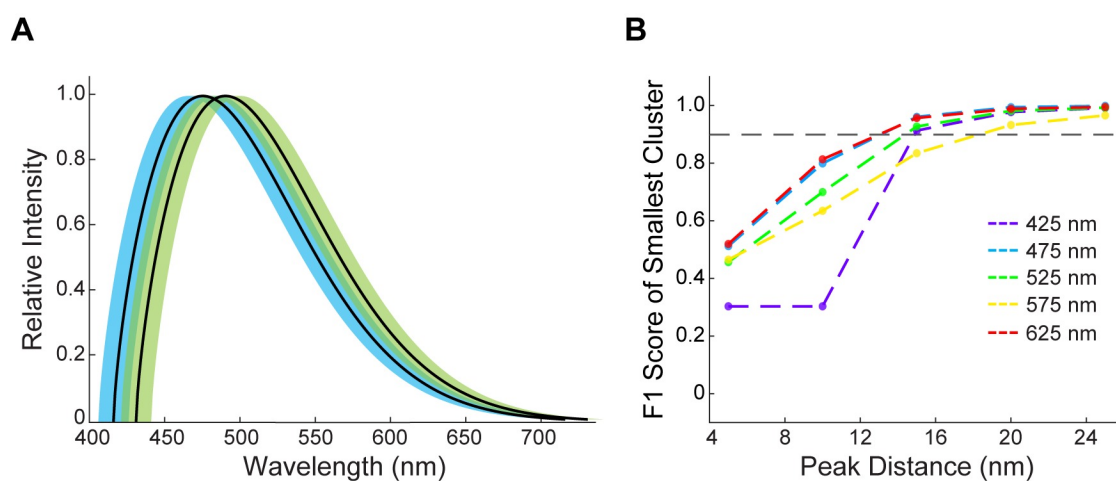

800

801 **S7 Fig. Two-fluorophore peak distance limitations.**

802 (A) Synthetic emission spectra of two fluorophores with peak emissions at 475 nm and 490 nm. 10 nm standard  
803 deviations for each spectra are shown in shaded area. (B) The performance of LUMoS for synthetic images of two  
804 fluorophores with variable distances between emission peaks. The cluster size ratio was fixed at 0.2, number of  
805 fluorophores at 2 and SNR at 10. For each color plotted, the peak of the lower wavelength fluorophore was fixed  
806 while the peak of the higher wavelength fluorophore was varied. Results of 10 simulations were averaged to  
807 obtain the final results.

808
